# Supplementary material for: Investigation of the wet removal rate of black carbon in East Asia: validation of a below- and in-cloud wet removal scheme in FLEXPART v10.4
Source: Copernicus journal article supplement (doi:10.5194/acp-2020-402), 2020-05-25
Supplement: Supplementary file 1 [file acp-2020-402-supplement.pdf]

*Supplement of*

**Investigation of the wet removal rate of black carbon in East Asia: validation of a below- and in-cloud wet removal scheme in FLEXPART v10.4**

**Yongjoo Choi et al.**

*Correspondence to:* Yongjoo Choi (choingjoo@jamstec.go.jp)

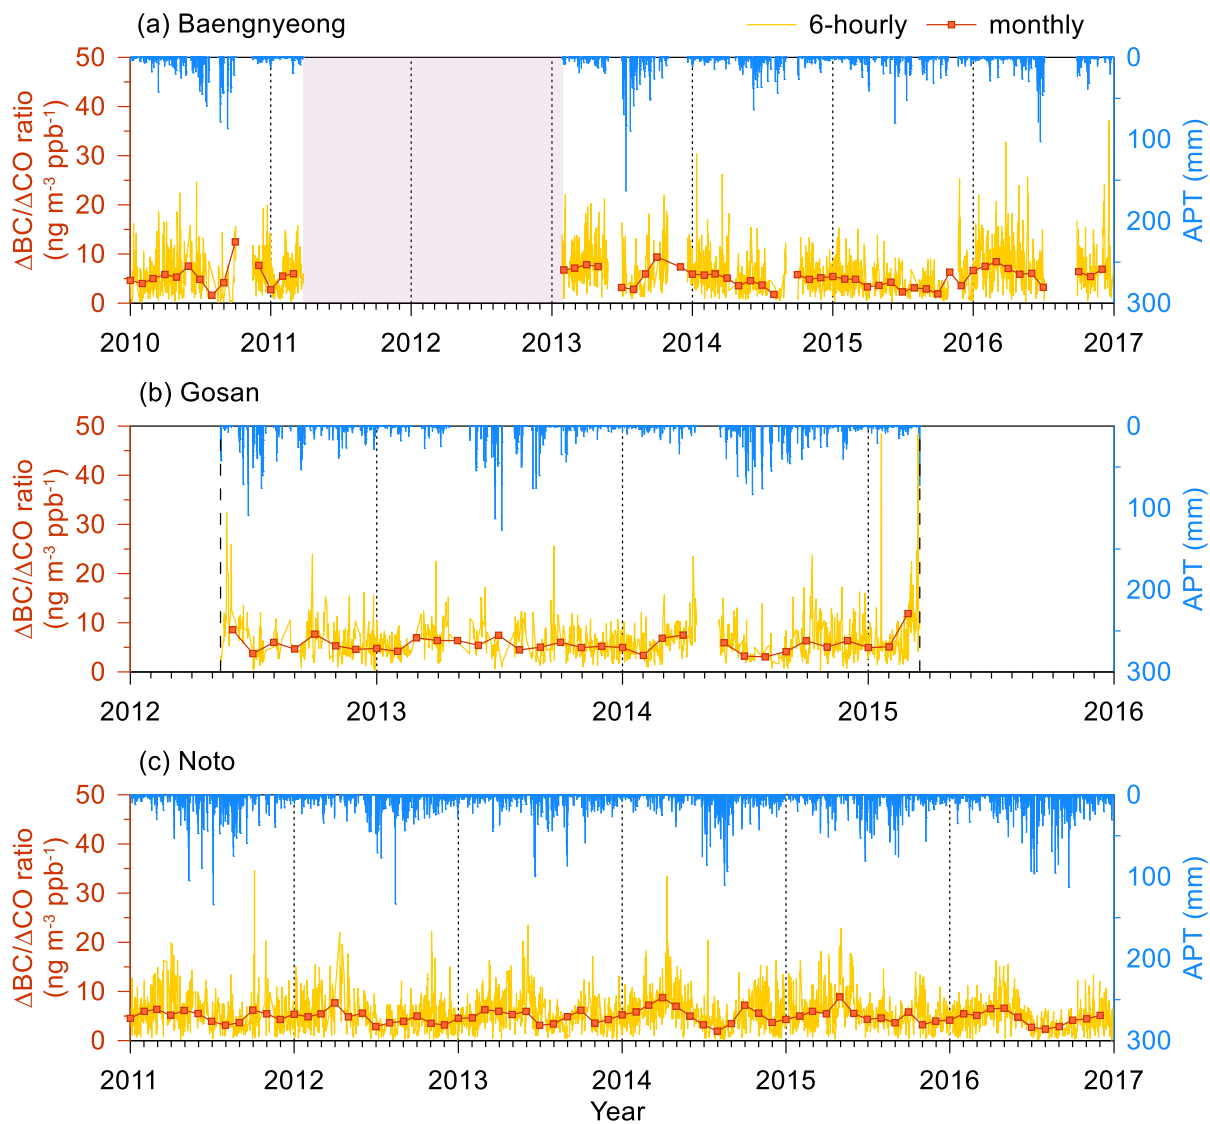

**Figure S1.** Time series of the  $\Delta\text{BC}/\Delta\text{CO}$  ratio and accumulated precipitation along trajectory (APT) during the measurement periods in (a) Baengnyeong (1 Jan 2010–31 Dec 2016), (b) Gosan (1 May 2012–30 Apr 2015), and (c) Noto (1 Jan 2011–31 Dec 2016). The square symbols with solid lines indicate monthly concentrations. The red shaded region in the Baengnyeong figure indicates periods of data missing from 2011 to 2012 due to the absence of CO data.
