# Supplementary material for: Investigation of the wet removal rate of black carbon in East Asia: validation of a below- and in-cloud wet removal scheme in FLEXPART v10.4
Source: Copernicus journal article supplement (doi:10.5194/acp-2020-402), 2020-05-25
Supplement: Supplementary file [file acp-2020-402-AC1-supplement.pdf]

## Response to Referee #1

*General Comments:* This paper introduces a method to access the wet removal rate of BC in East Asia based on long-term measurements, in the aspect of the air mass back trajectories. The authorship made effort to obtain the overall wet removal rates of BC as a function of accumulated precipitation along trajectories, the half-life and  $e$ -folding lifetime. Depending on the measurement sites, the wet removal rates of BC showed large regional differences, and various reasons are explored. Further, they diagnosed the scavenging coefficients of the below- and in-cloud scavenging scheme implemented in the FLEXible PARTicle (FLEXPART) Lagrangian transport model with the obtained wet removal rates of BC, and suggested that underestimation of wet scavenging coefficients in the model simulation. Finally, they evaluated the relative importance of various factors in the in-cloud scavenging process, and indicated that the convective available potential energy should be considered to better represent the regional difference of BC wet scavenging over East Asia. The topic of the manuscript is well suited for publication in ACP. The long-term dataset are generally applicable, whereas some discussions are lack of persuasion. I suggest more effort should be put into the presentation of the results before publication. My major concern is about the preset for the calculation and the reasons for the regional difference of wet removal efficiency.

Response: We thank the reviewer for carefully reviewing the manuscript and providing valuable comments. We also acknowledge your valuable comments and suggestions that greatly helped to improve the manuscript. The following are our responses to your specific comments. For convenience, your comments are italicized and numbered. The line (L) numbers in the responses correspond to those in the revised manuscript. The changes in the revised manuscript are underlined in the responses as necessary, and are indicated as ‘tracked changes’ in the manuscript.

1. *The authors used 500 m as a starting altitude and 72h back trajectories were calculated. Is it an arbitrary selection? How does this affect the final assessment of wet removal?*

We replaced the past 72 h backward trajectory, which can represent the wet deposition effects, to the past 120 h by considering the BC lifetime ( $\sim 5$  d) and including dry deposition effects; however, the results are exactly the same as in the original manuscript because identified potential emission source regions are consistent with the original manuscript. The difference in the starting altitude (500 m vs. 1000 m) did not impact our results; i.e., the ranges of the TE for sites, regions and seasons used in Table 1 and below- and in-cloud cases in Table 2 were similar to the original results (Sect. S1 in the Supplement). A detailed explanation of the uncertainty due to the selection of different starting altitudes was addressed as follows:

“To identify the air mass origin region, 5 d (72 120 h) backward trajectories were calculated four times a day (00, 06, 12, 18 UTC) using the Hybrid Single Particle Lagrangian Integrated Trajectory (HYSPLIT) Model version 4 (Draxler et al., 2018). The starting altitude was 500 m above ground level (AGL). The past 120 h of backward simulation time was selected by considering the lifetime of BC ( $\sim 5$  d; Lund et al., 2017, 2018; Park et al., 2005). It should be noted that the different starting altitude (500 m vs. 1000m) did not impact on our results (Sect. S1 in the Supplement).” (L140–144)

“Our main results, including the TE,  $\Lambda_{\text{below}}$ , and  $\Lambda_{\text{in}}$ , could be influenced by selecting (1) different starting altitudes of the backward trajectories and (2) different altitude criteria for identifying the potential emission region.

First, to investigate the uncertainty caused by different starting altitudes of the backward trajectories, we analyzed the Welch’s  $t$ -test for APT derived from starting altitudes of 500 m and 1000 m. The APT between the two datasets did not show a significant difference (3%) ( $p \geq 0.1$ ). Depending on the site, the TE showed a significant difference ( $p < 0.05$ ) at Gosan only at a relatively small value of  $-4.2\%$ . In the case of regional TE, Northeast China and South Korea were significantly different ( $p < 0.01$ ), with original values up to  $-15\%$ ; however, the corresponding APT for achieving TE=0.5 and TE=1/e

only decreased by  $-6\%$  and  $-2\%$ , respectively. The regional wet removal efficiency was more apparent, such as more or less APT needed to attain  $TE=0.5$  and  $TE=1/e$  in low-efficiency regions (East and North China) and high-efficiency regions (South Korea and Japan), respectively. For the high starting altitude, i.e., 1000 m, the airmass had a higher chance of being exposed to in-cloud scavenging resulting in a much lower TE for in-cloud scavenging ( $-3\%$ ). Otherwise, the TE for below-cloud scavenging cases was increased by 7% because of a reduced chance to expose washout effects (Table S1). Because of the variations in the TE for below- and in-cloud scavenging cases, the calculated median  $\Lambda_{\text{below}}$  and  $\Lambda_{\text{in}}$  converged within a similar range as the original results. It should be noted that the median measured  $\Lambda_{\text{below}}$  was slightly higher than the calculated  $\Lambda_{\text{below}}$  according to FLEXPART, which is opposite the original results. The small difference could be ignored when considering the insufficient sample number for below-cloud cases at a starting altitude of 1000 m.” (Sect. S1 in the Supplement)

**Table S1.** Same as Table 2 except for the different backward trajectory starting altitudes (1000 m)

| Cases                                                                 | Median                | Interquartile range (25 <sup>th</sup> percentile – 75 <sup>th</sup> percentile) |
|-----------------------------------------------------------------------|-----------------------|---------------------------------------------------------------------------------|
| (a) Below cloud ( $N_{\text{case}} = 262$ )                           |                       |                                                                                 |
| TE                                                                    | 0.95                  | [0.65 – 1.28]                                                                   |
| Measured $\Lambda_{\text{below}}$ ( $\text{s}^{-1}$ )                 | $8.85 \times 10^{-6}$ | $[6.57 \times 10^{-6} - 1.46 \times 10^{-5}]$                                   |
| Calculated $\Lambda_{\text{below}}$ ( $\text{s}^{-1}$ ) <sup>a</sup>  | $7.49 \times 10^{-6}$ | $[6.83 \times 10^{-6} - 8.42 \times 10^{-6}]$                                   |
| (b) In-cloud ( $N_{\text{case}} = 953$ )                              |                       |                                                                                 |
| TE                                                                    | 0.70                  | [0.46 – 1.02]                                                                   |
| Measured $\Lambda_{\text{in}}^*$ ( $\text{s}^{-1}$ ) <sup>b</sup>     | $7.67 \times 10^{-5}$ | -                                                                               |
| Calculated $\Lambda_{\text{in}}^*$ ( $\text{s}^{-1}$ ) <sup>a,b</sup> | $8.01 \times 10^{-6}$ | -                                                                               |

<sup>a)</sup> Calculated by FLEXPART scheme

<sup>b)</sup> Overall median value

2. *The authors attributed the regional difference in wet removal efficiency to the difference in the coating thickness of BC particles. In the discussion section, they consider that depending on the emission sectors, the coating thickness of BC particles could be a major factor causing the difference in the wet removal efficiency. I think such explanation is hard to believe. The freshly emitted BC particles has transported for a long distant before scavenged. How could the freshly emitted BC particles affect their coating thickness before scavenged? Actually, there are many published paper showing factors that drive the ageing of BC, which should be included in the discussion.*

We agree with the reviewer’s opinion that the BC aging process is most important when considering the predominance of in-cloud scavenging. Therefore, we added the description of the BC aging process and frequency of below- and in-cloud scavenging conditions as the most plausible reasons causing regional and seasonal differences in wet scavenging efficiency. The explanation of difference in coating thickness of BC upon emission was removed because of the lack of evidence supporting our hypothesis.

“According to the relationship between accumulated precipitation along trajectory and TE, TE the wet removal efficiency was lower in East and North China, where the industrial sector (thin-coated) is dominant; in contrast, that but higher in South Korea and Japan showed higher values, implying the importance of the aging process and frequency of exposure to below- and in-cloud scavenging conditions during airmass transport due to the transport sector (thick-coated), with emissions mainly from diesel vehicles. By the same token Moreover, TE the wet scavenging in winter and summer showed the highest and lowest values efficiency, respectively, although the lowest removal efficiency in summer was primarily associated with a reduced BC aging process because the in-cloud scavenging condition was dominant, depending on the dominant emission sectors, such as house heating (thick-coated) and industry.”(L23–30)

“According to the pathway of airmass transportation, the detailed meteorological information for, such as precipitation (sum of large-scale and convective precipitation), and clouds, and so on, was

acquired based on the air mass transportation pathway from ERA5 hourly data at both single and pressure levels (37 levels; 1000 hPa to 1 hPa) to identify the below- and/or in-cloud cases and to calculate the wet scavenging coefficients. By considering the vertical height of the air mass from the HYSPLIT model and cloud information from ERA5, we successfully distinguished the dominant cases for below-cloud (no residence time within cloud) and in-cloud (no residence time below cloud) cases when precipitation  $\geq 0.01 \text{ mm hr}^{-1}$  and calculated the wet scavenging coefficients.” (L148–153)

“The differences in regional and seasonal wet removal rates could be explained might be influenced by the frequency of exposure to below- and in-cloud scavenging condition during transport as well as the magnitude of aging process causing the different coating thicknesses the different coating thicknesses according to the BC emission sources (thin- and thick-coated BC from the industrial and residential sectors, respectively) because the thick-coated BC particles are preferentially removed due to cloud processes.” (L461–465)

“To quantify the effect of below- and in-cloud scavenging, we investigated the fraction of exposure to below- and in-cloud scavenging conditions during the air mass transport according to regions. Among the total frequency of grid cells which air mass passed (~500,000), ~25% of the grid cells were exposed to below- (~10%) and in-cloud scavenging conditions (~15%), indicating that the in-cloud conditions were relatively predominant in wet scavenging over East Asia. The higher wet removal efficiency region (South Korea and Japan) revealed an apparently higher fraction of exposure to below- (~11%) and in-cloud scavenging conditions (~19%) compared to the air mass from East and North China (~8% for below- and ~10% for in-cloud scavenging condition), suggesting the importance of in-cloud scavenging process for wet deposition.

Second, the difference in the degree of BC aging process could be an important factor for determining the wet scavenging efficiency. Freshly emitted BC particle have small diameters, exhibit a thin coating thickness, and are hydrophobic; thus, they would not be effective in wet scavenging compared to aged BC particles. Typically, the coefficient of BC aging rate in North China Plain was significantly higher than that used in previous models (e.g., Cooke and Wilson, 1996; Koch and Hansen, 2005; Xu et al., 2019) due to the highly polluted environments (Zhang et al., 2019); however, the coefficients over East Asia are still unknown. In addition, the median regional traveling time of air masses to each site (11–47 h for Baengnyeong; 18–37 h for Gosan; 19–62 h for Noto) was different. Therefore, the difference in both the level of BC aging coefficient and traveling time depending on the region, which can influence the coating thickness of BC particles, might be another plausible reason underlying the regional differences in the wet removal efficiency the difference in the coating thickness of BC particles, depending on the emission sectors, could be a major factor causing the difference in the wet removal efficiency because thickly-coated BC particles are much easier to remove by wet scavenging than less coated and/or freshly emitted BC (Ding et al., 2019; Miyakawa et al., 2017; Moteki et al., 2012). Typically, BC emitted from industrial regions, transport from diesel vehicles, and domestic sectors has characteristics of weakly, moderate, and strongly coated BC, respectively (Han et al., 2019; Liu et al., 2019), based on insignificant differences in the MMD of BC from those emission sectors (190–200 nm). This result coincided with the major emission sector of the REAS emission inventory in East and North China and North Korea (~57.5% emitted from industrial sectors) compared to other sites (12%–39%). In contrast, Northeast China showed low APT for reaching  $TE=0.5$  and  $TE=1/e$  because the dominant BC emission sector was residential sector (48.3%) which has a thickly coated characteristic. BC from South Korea and Japan reached  $TE=0.5$  and  $TE=1/e$  with a small amount of APT because moderately coated BC was mostly emitted from the transport sector (73.4%), mainly from diesel vehicles. It should be noted that the dominant emission sectors of industry (for East and North China and North Korea) or transport sectors (South Korea and Japan) were also confirmed by the Emission Database for Global Atmospheric Research (EDGAR) in 2010 and MIX in 2010 (Li et al., 2017; Crippa et al., 2018).

By the same token, in the case of seasonal variation in  $TE$  wet removal efficiency, the decreasing

magnitude of TE according to APT was obviously emphasized in fall and winter, which was much steeper than that in spring and summer (Figure 4b). This tendency ~~was reflected~~ differences in not only the degree of aging process, but also the fraction of exposure to below- and in-cloud scavenging conditions. The fraction of below- and in-cloud scavenging in spring were lower at ~7% and ~11%, respectively, compared to those in fall and winter (11% for below- and 16% for in-cloud scavenging conditions). The fraction of in-cloud scavenging cases was the highest in summer (17%) compared to the other seasons, but the APT for reaching TE=0.5 was also high, indicating that the removal efficiency of in-cloud scavenging was reduced. Considering the less pollution in summer, the lowest wet removal efficiency might be fully explained by the low coefficient of BC aging rate compared to that in other seasons (Zhang et al., 2019) ~~in the effect of the residential sector, which has thickly coated BC, which increased due to house heating as the temperature decreased. In contrast to winter, the APT for reaching TE=0.5 in spring and summer was the highest among the seasons. This might be caused by the increasing fraction of BC from the industrial sector in China while decreasing emissions from residential sectors (Kurokawa et al., 2013).~~" (L274–315)

#### Specific comments:

1. *Introduction: "Specifically, the in-cloud process is more efficient and complicated than the below-cloud process because the nucleation removal of aerosol particles within clouds is thought to account for more than 50% of the aerosol particle mass removal from the atmosphere globally" I wonder if there are any scavenging efficiency data for BC alone, since this paper mainly focus on the wet removal of BC.*

We replaced the sentences to focus on BC particles as follows:

"Wet deposition of BC, whose contribution to total removal is 79% (Textor et al., 2006), is still challenging to predict BC concentrations in the atmosphere due to the difficulties of accurate evaluation of wet removal (Emerson et al., 2018; Bond et al., 2013; Lee et al., 2013). Specifically, the in-cloud process is more efficient and complicated than the below-cloud process because the nucleation removal of aerosol particles within clouds is thought to account for ~~more than 50~~  $46 \pm 50\%$  of the ~~aerosol~~ BC particle mass removal from the atmosphere globally, although this is dependent on the selected global model (Grythe et al., 2017; Textor et al., 2006)." (L61–66)

2. *Introduction: "Wet deposition is still challenging to predict BC concentration in the atmosphere due to the difficulties of accurate evaluation of wet removal." It would be better to include more explanation on why it is challenging to represent wet deposition, which tightly links to the discussion section of this paper.*

We added a detailed description of the reasons for the difficulties in accurately evaluating the wet removal of BC as follows:

"This can partly be attributed to the following three reasons: (1) inaccurate bottom-up emission inventory, (2) the complexity of BC hygroscopicity, and (3) an imprecise dry/wet deposition scheme. First, when estimating the impact of BC using global models, the results usually contain large uncertainties in BC emissions (Cooke and Wilson, 1996; Chung and Seinfeld, 2002; Stier et al., 2007) because BC is mainly contributed by scattered emission sources. Therefore, the uncertainty of BC emission rates is large compared to other species (e.g., SO<sub>2</sub>, NO<sub>x</sub>, and CO<sub>2</sub>) whose emissions are dominated by large sources (Kurokawa et al., 2013; Zheng et al., 2018). Without appropriate constraints on the emissions, removal cannot be well quantified. Second, although BC itself is hydrophobic immediately after emission, it is subsequently converted to possessing hydrophilic properties through the aging process, in which water-soluble compounds coat BC, and during atmospheric transportation (Moteki et al., 2007; Matsui et al., 2018), and finally acts as cloud condensation nuclei (Kuwata et al., 2007; Bond et al., 2013). Such conversion depends on the initial state of the BC along with atmospheric conditions (presence of other particles and gases) and it has high spatial and temporal variabilities (Vignati et al., 2010)." (L49–59)

“However, there is insufficient in-field detailed observations to explain and quantify the interactions between BC and cloud particles at the microscale, which hinders a better understanding of the physical processes (Ding et al., 2019).” (L66–68)

3. *Introduction: It would be better to simply explain “emission rates and deposition terms”.*

We provided additional detail regarding the ‘emission rates and deposition terms’ as follows:

“Although some previous studies have investigated wet scavenging schemes in models (Grythe et al., 2017; Croft et al., 2010), those results without well-constrained emission rates contain large ambiguity when assessing the wet deposition term (Vignati et al., 2010) may include bias due to the effect of inaccurate emission rate because emission rates and deposition terms were not necessarily separated. For the first time, the emission and deposition terms are distinctly separated in this study by introducing TE and using backward simulations; this allows thus allowing for the wet scavenging scheme to be evaluated more accurately because backward simulations do not account for the emission rate.” (L92–98)

4. *Experimental section: “when the air mass altitude was lower than 2.5 km...”. Is there any explanation for this?*

We added a discussion of the uncertainty in the criteria for selecting the altitude as follows:

“We checked the uncertainty arising from selecting different criteria for altitude (1.5 km), but there was no significant difference in the results (Sect. S1 in the Supplement).” (L171–172)

“Second, we also checked the difference in wet scavenging efficiency, which can be caused by applying 1.5 km (instead of 2.5 km) as a threshold to determine the potential emission region. The identified six administrative districts for potential emission regions at an altitude of 1.5 km were same as those at an altitude of 2.5 km. The median traveling time from potential source regions to receptor sites was decreased from 38 h to 25 h when precipitation occurred because the individual potential source region was closer to the receptor site because the selection altitude was decreased. However, the difference in traveling time did not significantly influence our final results because the TE for below- and in-cloud cases only decreased by 1% and 6% and the measured  $\Lambda_{\text{below}}$  and  $\Lambda_{\text{in}}$  were consistent with the original results within  $\pm 54\%$  (Table S2). From these results, we confirmed the representativeness of our regional and seasonal wet removal efficiency analysis.” (Sect. S1 in the Supplement)

**Table S2.** Same as Table 2 except for the different altitude criteria (1.5 km) for identifying potential emission source regions.

| Cases                                                                 | Median                | Interquartile range (25 <sup>th</sup> percentile – 75 <sup>th</sup> percentile) |
|-----------------------------------------------------------------------|-----------------------|---------------------------------------------------------------------------------|
| (a) Below cloud ( $N_{\text{case}}=436$ )                             |                       |                                                                                 |
| TE                                                                    | 0.88                  | [0.60 – 1.24]                                                                   |
| Measured $\Lambda_{\text{below}}$ ( $\text{s}^{-1}$ )                 | $6.17 \times 10^{-6}$ | $[2.55 \times 10^{-6} - 1.39 \times 10^{-5}]$                                   |
| Calculated $\Lambda_{\text{below}}$ ( $\text{s}^{-1}$ ) <sup>a</sup>  | $7.52 \times 10^{-6}$ | $[6.88 \times 10^{-6} - 8.50 \times 10^{-6}]$                                   |
| (b) In-cloud ( $N_{\text{case}}=282$ )                                |                       |                                                                                 |
| TE                                                                    | 0.68                  | [0.44 – 1.03]                                                                   |
| Measured $\Lambda_{\text{in}}^*$ ( $\text{s}^{-1}$ ) <sup>b</sup>     | $9.39 \times 10^{-5}$ | -                                                                               |
| Calculated $\Lambda_{\text{in}}^*$ ( $\text{s}^{-1}$ ) <sup>a,b</sup> | $8.15 \times 10^{-6}$ | -                                                                               |

<sup>a)</sup> Calculated by FLEXPART scheme

<sup>b)</sup> Overall median value

5. *Line 199-: Is there any correlation between wet removal of BC and meteorological parameters?*

The median TE as a function of the site showed a good correlation with the precipitation rate and total column cloud water ( $R \geq 0.94$ ) and moderate correlation with cloud cover and cloud bottom heights ( $R \geq 0.52$ ) because only three data records were available. Thus, we did not add the R value between two variables in this qualitative analysis section because a detailed analysis was conducted in the

following sections according to the back trajectories along with their meteorological conditions.

Minor:

1. *Line 65: “stat”?*

We revised it to ‘states.’ (L81)

2. *Line 73: “significant”?*

We changed this term to ‘considerable.’

“Recently, numerous fine mode particles, including BC<sub>1</sub> from polluted areas scavenging in clouds were more pronounced in East Asia, not only at a local scale but also at a large regional scale (Liu et al., 2018), because high aerosol loading conditions are usually associated with considerable significant cloud cover, which results in a higher frequency of wet scavenging (Eck et al., 2018).” (L84–87)

3. *Line 136: “good spatial coverage”?*

We replaced ‘good spatial coverage’ with a detailed description.

“Figure 1c reveals the geographical distribution for the mean BC mass of identified potential emission regions, indicating that this approach was appropriate because ~~of good spatial coverage~~ the potential emission regions were uniformly distributed over East Asia, including East China, a major emission source for BC.” (L167–169)

4. *Line 149: “thus the TE was an effective indicator”.*

We revised it as follows:

“... thus the TE ~~was~~ is an effective indicator ...” (L184)

5. *Line 193: “However”?*

We deleted the conjunction ‘however’.

~~“However, previous~~ Previous studies reported that the mass median diameter (MMD) ...” (L236)

# Investigation of the wet removal rate of black carbon in East Asia: validation of a below- and in-cloud wet removal scheme in FLEXPART v10.4

Yongjoo Choi<sup>1</sup>, Yugo Kanaya<sup>1</sup>, Masayuki Takigawa<sup>1</sup>, Chunmao Zhu<sup>1</sup>, Seung-Myung Park<sup>2</sup>, Atsushi Matsuki<sup>3</sup>, Yasuhiro Sadanaga<sup>4</sup>, Sang-Woo Kim<sup>5</sup>, Xiaole Pan<sup>6</sup>, Ignacio Pissó<sup>7</sup>

<sup>1</sup> Research Institute for Global Change, Japan Agency for Marine-Earth Science and Technology (JAMSTEC), Yokohama, 2360001, Japan

<sup>2</sup> Division of Climate & Air Quality Research, National Institute of Environmental Research, Kyungseo-dong, Seo-Gu, Incheon 404170, Korea

<sup>3</sup> Institute of Nature and Environmental Technology, Kanazawa University, Kanazawa 9201192, Japan

<sup>4</sup> Department of Applied Chemistry, Graduate School of Engineering, Osaka Prefecture University, 1-1 Gakuen-cho, Nakaku, Sakai, Osaka 5998531, Japan

<sup>5</sup> School of Earth and Environmental Sciences, Seoul National University, Seoul 08826, Korea

<sup>6</sup> Institute of Atmospheric Physics, Chinese Academy of Sciences, Beijing, China

<sup>7</sup> NILU – Norwegian Institute for Air Research, Kjeller 2027, Norway

Correspondence to: Yongjoo Choi (choingjoo@jamstec.go.jp)

## Abstract

Understanding the global distribution of atmospheric black carbon (BC) is essential to unveil its climatic effect. However, there are still large uncertainties regarding the simulation of BC transport due to inadequate information about the removal process. We accessed the wet removal rate of BC in East Asia based on long-term measurements over the 2010–2016 period at three representative background sites (Baengnyeong and Gosan in South Korea and Noto in Japan). The average wet removal rate, represented by transport efficiency (TE), i.e., the fraction of undeposited BC particles during transport, was estimated as to be 0.73 in East Asia from 2010 to 2016. According to the relationship between accumulated precipitation along trajectory and TE, ~~TE~~the wet removal efficiency was lower in East and North China, ~~where the industrial sector (thin-coated) is dominant; in contrast, but higher~~that in South Korea and Japan ~~showed higher values, implying the importance of the aging process and frequency of exposure to below- and in-cloud scavenging conditions during airmass transport due to the transport sector (thick-coated), with emissions mainly from diesel vehicles.~~ By the same token ~~Moreover, TE~~the wet scavenging in winter and summer showed the highest and lowest ~~value~~efficiency, respectively, although the lowest removal efficiency in summer was primarily associated with a reduced BC aging process because the in-cloud scavenging condition was dominant, depending on the dominant emission sectors, such as house heating (thick-coated) and industry. The average half-life and *e*-folding lifetime of BC were 2.8 and 7.1 days, respectively, which is similar to previous studies, but those values differed according to the geographical location and meteorological conditions of each site. Next, by comparing TE from the FLEXible PARTicle (FLEXPART) Lagrangian transport model (version 10.4), we diagnosed the scavenging coefficients ( $s^{-1}$ ) of the below- and in-cloud scavenging scheme implemented in FLEXPART. The overall median TE from FLEXPART (0.91) was overestimated compared to the measured value, implying underestimation of wet scavenging coefficients in the model simulation. The median of the measured below-cloud scavenging coefficient showed a lower value than that calculated ~~from according to~~ FLEXPART scheme, by a factor of 1.7. On the other hand, the overall median of the calculated FLEXPART in-cloud scavenging coefficients from FLEXPART scheme was highly underestimated by 1 order of magnitude compared to the measured value. From ~~the an~~ analysis of artificial neural networks, the convective available potential energy, which is well known as an indicator of vertical instability, should be considered in the in-cloud scavenging process to improve the representative regional difference in BC wet scavenging over East Asia. For the first time, this study suggested an effective and straightforward evaluation method for

42 wet scavenging schemes (both below- and in-cloud) by introducing TE along with excluding effects from the inaccurate  
43 emission inventories.



## 1. Introduction

Black carbon (BC) is the most significant light-absorbing aerosol that can cause positive radiative forcing on climate change (Winiger et al., 2016; Myhre et al., 2013; Bond et al., 2013; Emerson et al., 2018). However, state-of-the-art models still have a limitations in evaluating the direct radiative forcing of BC because of the large model uncertainties in simulating BC concentrations (Xu et al., 2019; Bond et al., 2013; Samset et al., 2014; Wang et al., 2014a; Schwarz et al., 2010; Sharma et al., 2013). This can partly be attributed to the following three reasons: (1) inaccurate bottom-up emission inventory, (2) the complexity of BC hygroscopicity, and (3) an imprecise dry/wet deposition scheme. First, when estimating the impact of BC using global models, the results usually contain large uncertainties in BC emissions (Cooke and Wilson, 1996; Chung and Seinfeld, 2002; Stier et al., 2007) because BC is mainly contributed by scattered emission sources. Therefore, the uncertainty of BC emission rates is large compared to other species (e.g., SO<sub>2</sub>, NO<sub>x</sub>, and CO<sub>2</sub>) whose emissions are dominated by large sources (Kurokawa et al., 2013; Zheng et al., 2018). Without appropriate constraints on the emissions, removal cannot be well quantified. Second, although BC itself is hydrophobic immediately after emission, it is subsequently converted to possessing hydrophilic properties through the aging process, in which water-soluble compounds coat BC, and during atmospheric transportation (Moteki et al., 2007; Matsui et al., 2018), and finally acts as cloud condensation nuclei (Kuwata et al., 2007; Bond et al., 2013). Such conversion depends on the initial state of the BC along with atmospheric conditions (presence of other particles and gases) and it has high spatial and temporal variabilities (Vignati et al., 2010). Third, while BC particles are transported in the atmosphere, they can be removed by dry and/or wet deposition, including below-cloud (i.e., washout) and in-cloud (i.e., rainout) processes. Wet deposition of BC, whose contribution to total removal is 79% (Textor et al., 2006), is still challenging to predict BC concentrations in the atmosphere due to the difficulties of accurate evaluation of wet removal (Emerson et al., 2018; Bond et al., 2013; Lee et al., 2013). Specifically, the in-cloud process is more efficient and complicated than the below-cloud process because the nucleation removal of aerosol particles within clouds is thought to account for more than 5046 ± 50% of the aerosol BC particle mass removal from the atmosphere globally, although this is dependent on the selected global model (Grythe et al., 2017; Textor et al., 2006). However, there is insufficient in-field detailed observations to explain and quantify the interactions between BC and cloud particles at the microscale, which hinders a better understanding of the physical processes (Ding et al., 2019).

Accompanied with the refinement of BC emission inventories over East Asia (Choi et al., 2020; Kanaya et al., 2016), wet removal rates have been one of the main topics a focal point to better predict BC behavior by using the term transport efficiency (TE), which is the observationally-determined fraction of undeposited BC particles during transport (e.g., Oshima et al., 2012; Kondo et al 2016), because TE shows a good relationship with accumulated precipitation along trajectory (APT; sum of precipitation over the past 72 h backward trajectory) (Choi et al., 2020; Kanaya et al., 2016) TE has been proven to be a good proxy for wet scavenging. Moteki et al. (2012), which was further elaborated from Oshima et al. (2012), reported the first observational evidence of the size-dependent activation of BC removal over the Yellow Sea during the Aerosol Radiative Forcing in East Asia (A-FORCE) airborne measurement campaign in the spring of 2009. Kondo et al. (2016) demonstrated an altitude dependence, with typical decreasing size distributions at higher altitudes associated with wet removal from A-FORCE in winter 2013. Kanaya et al. (2016) elucidated the relationship between the wet removal rate of BC and accumulated precipitation along trajectory (APT) from long-term measurements (2009–2015) at Fukue, Japan. Miyakawa et al. (2017) reported the effects of BC aging related to in-cloud scavenging during transport on the alteration of the BC size distribution and mixing states during the spring of 2015 at the same location. Matsui et al. (2013) demonstrated that the difference in the coating thickness of BC particles depended on the growing process (condensation and coagulation), indicating that the coagulation process is necessary to produce thickly coated BC particles that are preferentially removed via the wet scavenging

process. Recently, numerous fine mode particles, including BC<sub>1</sub> from polluted areas scavenging in clouds were more pronounced in East Asia, not only at a local scale but also at a large regional scale (Liu et al., 2018), because high aerosol loading conditions are usually associated with ~~considerable~~significant cloud cover, which results in a higher frequency of wet scavenging (Eck et al., 2018).

BC and carbon monoxide (CO) are byproducts of the incomplete combustion of carbon-based fuels, and the ratio between  $\Delta BC$  (the difference from the baseline level) and  $\Delta CO$  ~~could be~~is a useful parameter for characterizing ~~combustion fuel~~ types. ~~due to~~because of their different carbon contents (Zhou et al., 2009; Guo et al., 2017). Adopting APT, a useful index for the strength of wet deposition (Kanaya et al., 2016; Kanaya et al., 2020), the magnitude of the BC wet removal rate ~~according to precipitation~~ can be easily characterized by the relationship between TE and APT. Although some previous studies have investigated wet scavenging schemes in models (Grythe et al., 2017; Croft et al., 2010), those results without well-constrained emission rates contain large ambiguity when assessing the wet deposition term (Vignati et al., 2010)~~may include bias due to the effect of inaccurate emission rate because emission rates and deposition terms were not necessarily separated~~. For the first time, the emission and deposition terms are distinctly separated in this study by introducing TE and using backward simulations; this allows thus allowing for the wet scavenging scheme to be evaluated more accurately because backward simulations do not account for the emission rate. By elaborating the regional  $\Delta BC/\Delta CO$  ratio (Choi et al., 2020), this study investigates the characteristics of the BC wet removal rate over East Asia using long-term measurements (more than 3 years) ~~with the best effort~~ to acquire reliable BC concentrations with wide spatial coverage over East Asia. The differences in wet removal rates depending on the measurement sites ~~and six~~ administrative districts (Figure 1c) and season are discussed in Sect. 3.1 and 3.2, respectively. Afterwards, to evaluate the representativeness of the scavenging scheme in the recently updated FLEXible PARTicle dispersion model (FLEXPART) version 10.4, the wet scavenging coefficients for below- and in-cloud processing were ~~estimated-validated from with~~ the measured wet removal rate by allocating the air mass location (such as below or within clouds) and meteorological variables along the pathway of air mass transport.

## 2. Methods

### 2.1 Measurement sites and instruments

To investigate wet removal rates of the outflow air mass from China and Korea peninsula, BC and CO data from three measurement sites (Baengnyeong, Gosan in Korea and Noto in Japan; Figure 1a) were carefully selected for this study by considering major emission sources near the measurement sites and by obtaining reliable BC concentrations from different instruments. ~~As~~Because detailed information on the measurement sites and instruments is described in Choi et al. (2020), we only address brief information here. Baengnyeong (124.63°E, 37.97°N), one of the Intensive Measurement Stations ~~intensive measurement stations~~ operated by the Korean Ministry of Environment, is frequently affected by airmasses from China (including East, North, and Northeast China) and North Korea. Gosan (126.17°E, 33.28°N) is located in the southern part of Korea and is frequently affected by airmasses from East China and South Korea. BC and CO were also measured at the Noto Ground-based Research Observatory (NOTOGRO, 137.36°E, 37.45°N), located on the Noto Peninsula on the western coast of Japan, which is frequently affected by airmasses from Northeast China and Japan. The measurement periods were mainly in the early 2010s but slightly different depending on the sites (Figure S1). The longest measurement period was in Noto for approximately 6 years (from 2011 to 2016), followed by that in Baengnyeong (5 years; 2010 to 2017 except for 2011 to 2012) and Gosan (3 years; 2012 to 2015).

In this study, we tried to obtain reliable BC concentrations from well-validated instruments, including OC–EC analyzers

(Sunset Laboratory Inc., USA) with optical corrections, multi-angle absorption photometers (MAAPs; MAAP 5012, Thermo Scientific), and a continuous light absorption photometer (CLAP), yielding good agreement in the BC concentrations between the instruments (uncertainty  $\leq \pm 15\%$ , except for CLAP at  $\leq \pm 20\%$ ) (Choi et al., 2020; Kanaya et al., 2008, 2013; Miyakawa et al., 2016, 2017; Taketani et al., 2016). As the best effort to obtain reliable BC concentrations from different instruments, only well validated instruments were used in this study. Hourly PM<sub>2.5</sub> elemental carbon (EC) was measured by a Sunset EC/OC analyzer with optical correction for Baengnyeong. Multi-angle absorption photometer (A MAAP-5012) was used to measure hourly BC in PM<sub>2.5</sub> for at Noto. At Gosan, BC in PM<sub>1</sub> was monitored by a continuous light absorption photometer (a CLAP) with three wavelengths including 467, 528, and 652 nm and the absorption was corrected following Bond (1999). At Noto, an improved mass absorption efficiency (MAE) of 10.3 m<sup>2</sup> g<sup>-1</sup> instead of the default value (6.6 m<sup>2</sup> g<sup>-1</sup>) was applied to estimate the BC mass concentration, as suggested based on calibrations using the thermal/optical method and the laser-induced incandescence technique (Kanaya et al., 2013; Kanaya et al., 2016). The CLAP also showed a good correlation with the co-located PM<sub>2.5</sub> EC concentrations from the Sunset EC/OC analyzer and the best-fit line was close to one (1.17), which is similar or slightly lower than the range of reported uncertainty of ~25% (Ogren et al., 2017). Hourly CO concentrations were measured by a gas filter correlation CO analyzer (Model 300 EU Teledyne Inc.) at Baengnyeong and by a nondispersive infrared absorption photometer (48C, Thermo Scientific) at the other two sites. The overall uncertainty of BC and CO measurements from different instruments was estimated to be less than 15% (except for Gosan; 20%) and 5%, respectively, which leads to a 10% uncertainty of in the overall regional  $\Delta BC/\Delta CO$  ratio (Choi et al., 2020).

## 2.2 Backward trajectory and meteorological data

To identify the air mass origin region, 5 d (72–120 h) backward trajectories were calculated four times a day (00, 06, 12, 18 UTC) using the Hybrid Single Particle Lagrangian Integrated Trajectory (HYSPLIT) Model version 4 (Draxler et al., 2018). The starting altitude was 500 m above ground level (AGL). The past 120 h of backward simulation time was selected by considering the lifetime of BC (~5 d; Lund et al., 2017, 2018; Park et al., 2005). It should be noted that the different starting altitude (500 m vs. 1000m) did not impact on our results (Sect. S1 in the Supplement). Notably, we used the European Centre for Medium-Range Weather Forecasts (ECMWF) ERA5, which provides a much finer resolution of 0.25°×0.25°, as input for HYSPLIT instead of Global Data Assimilation System (GDAS); 1°×1° data with 23 pressure levels to improve the accurate assessment of the air mass transportation pathways and to acquire more detailed information on the meteorological conditions. According to the pathway of air mass transportation, the detailed meteorological information, such as –for precipitation (sum of large-scale and convective precipitation), and clouds, and so on, was acquired from ERA5 hourly data at both single and pressure levels (37 levels; 1000 hPa to 1 hPa) to identify the below and/or in-cloud cases and to calculate the wet scavenging coefficients. By considering the vertical height of the air mass from the HYSPLIT model and cloud information from ERA5, we successfully distinguished the dominant cases for below-cloud (no residence time within cloud) and in-cloud (no residence time below cloud) cases when precipitation  $\geq 0.01$  mm hr<sup>-1</sup> and calculated the wet scavenging coefficients.

As the air mass was being transported, if precipitation occurred before the air mass arrived at the main BC source region, which is the highest BC emission area, it is difficult to investigate then the magnitude of wet removal effect as a function of APT could be underestimated at receptor sites because the air mass containing BC would not have been exposed to wet scavenging conditions effects of precipitation could be underestimated at receptor sites. Therefore, we considered the residence time (Li et al., 2014; Ashbaugh et al., 1985) of each grid cell (0.25°×0.25°) and the BC emission rates (mass time<sup>-1</sup>) from the Regional Emission inventory in ASia (REAS; Figure 1a) emission inventory (Kurokawa et al., 2013) version 2.1 to identify the potential emission region by multiplying residence time and emission rates. First, when the air mass altitude was lower than

2.5 km, the air mass velocities ( $V_n$  and  $V_{n+1}$ ) were calculated by distances from the central point in a target grid cell to two-way endpoints of backward trajectories ( $D_n$  and  $D_{n+1}$ ) using  $V_n = D_n / \Delta t$  and  $V_{n+1} = D_{n+1} / \Delta t$  (Figure 1b), where  $\Delta t$  and  $n$  represent the time interval of meteorological data (1 h) and  $n$ th grid cell, respectively. Then, by assuming that the air mass velocity is constant within the time interval, the residence time in a grid cell ( $T_{grid}$ ) was calculated by considering both the distance of each grid corner ( $d_n$  and  $d_{n+1}$ ) and the corresponding velocities ( $V_n$  and  $V_{n+1}$ ) using  $d_n / V_n + d_{n+1} / V_{n+1}$ . Based on the identified potential emission region, APT was recalculated only after the air mass passed through the potential emission region when precipitation occurred when APT over the past 72 h was higher than 0. Figure 1c reveals the geographical distribution for the mean BC mass of identified potential emission regions, indicating that this approach was appropriate because of good spatial coverage the potential emission regions were uniformly distributed over East Asia, including East China, a major emission source for BC. We checked the uncertainty arising from selecting different criteria for altitude (1.5 km), but there was no significant difference in the results (Sect. S1 in the Supplement).

### 2.3 Transport efficiency (TE)

The TE of BC is defined as the ratio of the BC and CO concentrations measured at the receptor site to that anticipated if there was no wet removal during transport (i.e., APT during past 72 h is zero). Thus, the TE of the air mass was calculated by eq. (1),

$$TE = \frac{[\Delta BC / \Delta CO]_{APT>0}}{[\Delta BC / \Delta CO]_{APT=0}} \quad (1)$$

where delta ( $\Delta$ ) indicates the difference between BC and CO concentrations and their baseline concentrations (Moteki et al., 2012; Oshima et al., 2012; Kanaya et al., 2016). The baseline CO was estimated as a 14-day moving 5th percentile from the observed CO mixing ratio, but the BC baseline was regarded as zero because the atmospheric lifetime of BC is known as several days, which is much shorter than that of CO (1–2 months).  $[\Delta BC / \Delta CO]_{APT=0}$  indicated the regional median value of  $\Delta BC / \Delta CO$  under dry conditions implying the original emission ratio. In our previous work, we successfully elucidated that  $[\Delta BC / \Delta CO]_{APT=0}$  depends on the regional characteristics of the energy consumption types (Kanaya et al., 2016; Choi et al., 2020). The decrease in the ratio with APT,  $[\Delta BC / \Delta CO]_{APT>0}$ , was related to BC-specific removal due to wet scavenging processes and thus the TE was-is an effective indicator to investigate the wet removal process. Although TE is also affected by dry deposition, but Choi et al. (2020) reported that the effect of dry deposition could be negligible-neglected because dry deposition velocities (0.01–0.03 cm s<sup>-1</sup>) are much lower than the default setting (0.1 cm s<sup>-1</sup>) in global models (Chung and Seinfeld, 2002; Cooke and Wilson, 1996; Emmons et al., 2010; Sharma et al., 2013) (Choi et al., 2020).

### 2.4 FLEXPART model

To compare the wet-removal-rates TE between the model-simulation-and measured values and model simulation, the FLEXPART v10.4 was used to simulate BC wet scavenging over East Asia using the backward mode. Detailed information for the FLEXPART is readily found in the literature (e.g., Pisso et al., 2019 and Stohl et al., 2005); thus, we only briefly describe the information here. The FLEXPART version 10.4 was-is the official version to allow turning on the wet scavenging module in the backward simulation mode (<https://www.flexpart.eu/downloads>, obtained 10 October 2019). The equations and detailed description for-of the below- and in-cloud scavenging scheme are explained in Pisso et al. (2019) and Grythe et al. (2017). The FLEXPART model was executed with operational reanalysis meteorological data from the ECMWF ERA-Interim at a spatial resolution of 1°×1° with 60 full-vertical-model levels from surface up to 0.1 hPa. Temporally, ECMWF-ERA-Interim has a resolution of 3 h, with 612 h analysis and 3 h forecast time steps. The period and daily frequency of simulation

were the same as those of the HYSPLIT model (past 72 h and four times, respectively). The grid resolution of FLEXPART was also same with ECMWF ERA-Interim ( $1^\circ \times 1^\circ$ ). It should be noted that chemistry and microphysics could not be resolved by the FLEXPART. The FLEXPART model, therefore, ignores the aging process (from hydrophobic to hydrophilic state changes and size changes of BC) and assumes that all BC particles are aged hydrophilic particles. A logarithmic size distribution of BC with a mean diameter of 0.16  $\mu\text{m}$  and a standard deviation of 1.84, in accordance with measurement in Japan, was used (Miyakawa et al., 2017). A total of  $10^4$  particles were randomly released at 500 m from each receptor site during 1 h when the measurement data were ~~existed~~ available. To validate the wet scavenging scheme in FLEXPART by comparison with the measured TE value, the wet scavenging coefficients for below- and in-clouds were extracted from FLEXPART to calculate TE (see Sect. 3.3 for more details). Note that the simulated TE from FLEXPART (FLEXPART TE) was only used for comparing with the measured TE. Despite the difference in the input meteorological fields between HYSPLIT and FLEXPART, the difference in air mass pathways and APT between two datasets can be neglected (Hoffmann et al., 2019; Sect. S2 in the Supplement).

### 3 Results

#### 3.1 Overall variation of transport efficiency (TE)

Figure 2 shows that measured  $[\Delta\text{BC}/\Delta\text{CO}]_{\text{APT}=0}$  (left panel) and TE variations (right panel) depend on APT and the measurement sites. The overall median  $[\Delta\text{BC}/\Delta\text{CO}]_{\text{APT}=0}$  was  $6.4 \text{ ng m}^{-3} \text{ ppb}^{-1}$ , which converged from Baengnyeong ( $6.2 \text{ ng m}^{-3} \text{ ppb}^{-1}$ ), Gosan ( $6.5 \text{ ng m}^{-3} \text{ ppb}^{-1}$ ) and Noto ( $6.7 \text{ ng m}^{-3} \text{ ppb}^{-1}$ ), indicating that TE is characterized by a regional  $[\Delta\text{BC}/\Delta\text{CO}]_{\text{APT}=0}$  per site. We divided APT into 9 range bins and applied exponential fitting equations to quantify the wet removal process. Among  $N_{\text{APT}>0}$  (total number of data points when  $\text{APT} > 0 \text{ mm}$ ), only the data point fraction in each bin to  $N_{\text{APT}>0} \geq 2\%$  was considered to secure the statistic. It should be noted that we found the relationship between TE and APT by using the stretched exponential decay (SED) equation,  $\exp(-A_1 \times \text{APT}^{A_2})$ , instead of the widely used equation,  $A - B \times \log(\text{APT})$ , because the coefficients of determination ( $R^2$ ) was improved ~~up from 0.940~~ to 0.981 though TE values from three sites were used (Table 1). This fitting equation is normally used to describe below-cloud scavenging, whereas wet removal of BC is generally believed to be dominated by in-cloud rather than below-cloud processes because of the small size of BC-containing particles. Therefore, the equations should contain both below- and in-cloud scavenging effects. The parameters  $A_1$  ( $0.269 \pm 0.039$ ) and  $A_2$  ( $0.385 \pm 0.035$ ) of the overall fitting were higher and lower, respectively, than the derived equation from the Fukue site ( $A_1 = 0.109$  and  $A_2 = 0.68$ ), which is the remote site in Japan ( $128.68^\circ \text{ E}$ ,  $32.75^\circ \text{ N}$ ) (Kanaya et al., 2016). It can be easily deduced that the wet removal effect at the three sites was initially more effective than that at Fukue, but the wet removal effect at Fukue gradually accelerated as the APT increased. In particular, the  $A_2$  value is important for calculating the ~~TE~~ amount of BC from emission sources for via long-range transport, e.g., toward the Arctic (Kanaya et al., 2016; Zhu et al., 2020), because  $A_2$  determines the magnitude of the wet removal efficiency according to APT. Thus, the newly obtained SED equation, which has a low  $A_2$  value, indicates that more BC will might be transported to the Arctic region than ~~previously that~~ reported by Kanaya et al. (2016).

The decreasing pattern of median TE for Baengnyeong did not closely follow the overall SED and had a much lower  $R^2$  (0.77), indicating that the wet removal process at Baengnyeong could not simply be expressed by APT. In contrast, the  $R^2$  of Gosan and Noto were sufficiently high to represent the wet removal characteristics. The aging process due to different traveling times might be one of the reasons. Because long-range transported BC has a larger core diameter than BC from local sources (Lamb et al., 2018; Ueda et al., 2016), these larger BC cores are preferentially removed via the wet scavenging process (Moteki



et al., 2012). ~~However, p~~Previous studies reported that the mass median diameter (MMD) of refractory BC (rBC) at Baengnyeong, Gosan, and Noto in spring were 218, 196, and 200 nm, respectively (Oh et al., 2015; Ueda et al., 2016; Oh et al., 2014) indicating much more aging compared with local emissions in Seoul, South Korea (180 nm) and Tokyo, Japan (163 nm) (Park et al., 2019; Ohata et al., 2019). In addition, the difference in the wet removal rate depending on measurement sites could be partly explained by ~~the differences~~ in meteorology. The monthly mean meteorological parameters indicated that Baengnyeong has characteristics of low precipitation (80.6 mm), cloud cover (0.57), total column cloud water ( $0.06 \text{ kg m}^{-2}$ ), and high cloud bottom height (2.5 km) compared to other sites, suggesting the lower exposure time to both below- and/or in-cloud condition during ~~the transportation~~ (Figure 3). In contrast, ~~the SED fittings for~~ both Gosan and Noto showed similar ranges of high precipitation (127 and 174 mm), total cloud cover (0.65 and 0.64), and total column cloud water (0.09 and  $0.12 \text{ kg m}^{-2}$ ) but low cloud bottom height (1.9 and 2.0 km), respectively. In addition, the ~~different BC coating thicknesses according to the emission source and fuel types could also contribute to the site difference of the wet removal rate, which difference in magnitude of aging BC and frequency of exposure to below- and in-cloud scavenging conditions~~ will be further discussed in Sect. 3.2.

Using the overall SED fitting equation, TE at 0.5 ( $TE=0.5$ ) and  $e$ -folding ( $TE=1/e$ ) could be reached when the APT values were 11.7 and 30.2 mm, respectively (Table 1). Similar to the SED results, Baengnyeong needed much higher precipitation of 70.9 and 202 mm to reach  $TE=0.5$  and  $TE=1/e$ , respectively, but the other sites showed lower APTs of 16.4 mm and 42.3 mm for Gosan and 8.0 mm and 20.3 mm for Noto, respectively. Considering the annual mean precipitation at the three sites (1542 mm), it took 2.8 and 7.1 days to reach  $TE=0.5$  and  $TE=1/e$ , respectively. Kanaya et al. (2016) reported a similar half-life and shorter  $e$ -folding lifetime for BC at Fukue ( $2.3 \pm 1.0$  and  $4.0 \pm 1.0$  days, respectively), calculated from the  $15.0 \pm 3.2$  mm and  $25.5 \pm 6.1$  mm of APT to reach  $TE=0.5$  and  $TE=1/e$ , respectively, along with annual precipitation, 2335 mm. This calculated  $e$ -folding lifetime in East Asia was much shorter than 16.0 days for BC from FLEXPART v10~~the global model~~ (Grythe et al., 2017).

Based on a similar approach over the Yellow Sea using an aircraft-borne single particle soot photometer (SP2) during the A-FORCE campaign (Oshima et al., 2012), attaining  $TE=0.5$  required different magnitudes of APT depending on not only the air mass origin but also the altitude. These authors also reported that the TE of northern China was higher than that of southern China regardless of altitude. Therefore, in the next section, we will further investigate why the difference in halving or  $e$ -folding lifetimes depends on region and season by analyzing the differences in the origin pathway of air masses ~~and the seasonal variation of BC emission sources~~.

### 3.2 Regional and seasonal variations of the transport efficiency (TE)

Figure 4 indicates the variation of TE depending on the potential source regions (hereafter regions) and seasons. The  $R^2$  for each ~~source~~-region ~~was~~ varied from 0.656 to 0.945 and was lower in East and North China and North Korea and higher in other regions (Table 1). A similar tendency of  $R^2$ , the APTs to achieve  $TE=0.5$  also showed regional differences~~different APTs~~, i.e., higher in East and North China and lower in other regions. The regional differences in wet removal efficiency can partly be attributed to the following reasons.

First, the transport pathway of air masses from East and North China could be less exposed to in-cloud scavenging than other regions because the most of potential emission source in East and North China is located over  $30^\circ\text{N}$  (Figure 1c), which has low cloud cover and water contents along with high cloud bottom heights (Figure 3). Although the amount of APT was similar to that in other regions, it was mostly composed of below-cloud scavenging; therefore, the wet removal efficiency should be lower than that in the dominant in-cloud scavenging region. To quantify the effect of below- and in-cloud scavenging, we

investigated the fraction of exposure to below- and in-cloud scavenging conditions during the air mass transport according to regions. Among the total frequency of grid cells which air mass passed (~500,000), ~25% of the grid cells were exposed to below- (~10%) and in-cloud scavenging conditions (~15%), indicating that the in-cloud conditions were relatively predominant in wet scavenging over East Asia. The higher wet removal efficiency region (South Korea and Japan) revealed an apparently higher fraction of exposure to below- (~11%) and in-cloud scavenging conditions (~19%) compared to the air mass from East and North China (~8% for below- and ~10% for in-cloud scavenging condition), suggesting the importance of in-cloud scavenging process for wet deposition.

Second, the difference in the degree of BC aging process could be an important factor for determining the wet scavenging efficiency. Freshly emitted BC particle have small diameters, exhibit a thin coating thickness, and are hydrophobic; thus, they would not be effective in wet scavenging compared to aged BC particles. Typically, the coefficient of BC aging rate in North China Plain was significantly higher than that used in previous models (e.g., Cooke and Wilson, 1996; Koch and Hansen, 2005; Xu et al., 2019) due to the highly polluted environments (Zhang et al., 2019); however, the coefficients over East Asia are still unknown. In addition, the median regional traveling time of air masses to each site (11–47 h for Baengnyeong; 18–37 h for Gosan; 19–62 h for Noto) was different. Therefore, the difference in both the level of BC aging coefficient and traveling time depending on the region, which can influence the coating thickness of BC particles, might be another plausible reason underlying the regional differences in the wet removal efficiency. ~~the difference in the coating thickness of BC particles, depending on the emission sectors, could be a major factor causing the difference in the wet removal efficiency because thickly-coated BC particles are much easier to remove by wet scavenging than less coated and/or freshly emitted BC (Ding et al., 2019; Miyakawa et al., 2017; Moteki et al., 2012). Typically, BC emitted from industrial regions, transport from diesel vehicles, and domestic sectors has characteristics of weakly, moderate, and strongly coated BC, respectively (Han et al., 2019; Liu et al., 2019), based on insignificant differences in the MMD of BC from those emission sectors (190–200 nm). This result coincided with the major emission sector of the REAS emission inventory in East and North China and North Korea (~57.5% emitted from industrial sectors) compared to other sites (12%–39%). In contrast, Northeast China showed low APT for reaching  $TE=0.5$  and  $TE=1/e$  because the dominant BC emission sector was residential sector (48.3%) which has a thickly coated characteristic. BC from South Korea and Japan reached  $TE=0.5$  and  $TE=1/e$  with a small amount of APT because moderately coated BC was mostly emitted from the transport sector (73.4%), mainly from diesel vehicles. It should be noted that the dominant emission sectors of industry (for East and North China and North Korea) or transport sectors (South Korea and Japan) were also confirmed by the Emission Database for Global Atmospheric Research (EDGAR) in 2010 and MIX in 2010 (Li et al., 2017; Crippa et al., 2018).~~

By the same token, ~~in the case of seasonal variation in  $TE$~~  wet removal efficiency, the decreasing magnitude of  $TE$  according to APT was obviously emphasized in fall and winter, which was much steeper than that in spring and summer (Figure 4b). This tendency ~~was reflected differences in not only the degree of aging process, but also the fraction of exposure to below- and in-cloud scavenging conditions. The fraction of below- and in-cloud scavenging in spring were lower at ~7% and ~11%, respectively, compared to those in fall and winter (11% for below- and 16% for in-cloud scavenging conditions). The fraction of in-cloud scavenging cases was the highest in summer (17%) compared to the other seasons, but the APT for reaching  $TE=0.5$  was also high, indicating that the removal efficiency of in-cloud scavenging was reduced. Considering the less pollution in summer, the lowest wet removal efficiency might be fully explained by the low coefficient of BC aging rate compared to that in other seasons (Zhang et al., 2019).~~ ~~in the effect of the residential sector, which has thickly coated BC, which increased due to house heating as the temperature decreased. In contrast to winter, the APT for reaching  $TE=0.5$  in spring and summer was the highest among the seasons. This might be caused by the increasing fraction of BC from the industrial sector in China while~~

~~decreasing emissions from residential sectors (Kurokawa et al., 2013).~~

### 3.3 Comparison of measured and FLEXPART-simulated TE

In this section, by extracting the wet scavenging coefficients ( $\Lambda$ ;  $s^{-1}$ ) from the FLEXPART simulations, the difference in TE between the measured and simulated values was investigated. The scavenging coefficient ( $\Lambda$ ;  $s^{-1}$ ) is defined as the rate of aerosol washout and/or rainout due to the wet removal process. The TE value based on measurements and FLEXPART can be expressed by multiplying each TE ( $1 - \text{removal rate}$ ) of serial grid cells as in eq. (2),

$$TE = (1 - \eta_1)(1 - \eta_2) \cdots (1 - \eta_n) \quad (2)$$

where  $\eta_n$  indicates the removal rate in the  $n$ th grid cell and is expressed as in eq. (3),

$$\eta = [1 - \exp(-\Lambda \cdot t)] \cdot f_g \quad (3)$$

where  $t$  and  $f_g$  indicate the residence time and fraction for the subgrid in a grid cell, respectively. Because the precipitation is not uniform in a single grid cell,  $f_g$  accounts for the variability of precipitation in a grid cell in FLEXPART.  $f_g$  is a function of large-scale and convective precipitation, as described in Stohl et al. (2005). Although the grid resolution of the input meteorological data for the HYSPLIT model ( $0.25^\circ \times 0.25^\circ$ ) is much finer than that for FLEXPART ( $1^\circ \times 1^\circ$ ), we assumed the same potential emission region as the HYSPLIT model for calculating TE because there was no significant difference in the air mass pathway between the two outputs as we discussed in Sect. S2 in the Supplement.

The overall median ~~value~~ of measured TE was 0.72, and Baengnyeong showed the highest (0.88), followed by Gosan (0.70) and Noto (0.68) due to reasons explained in the previous sections. In comparison, the overall median ~~value~~ of FLEXPART TE (0.91) was much higher than the measured TE, indicating that the wet scavenging coefficients in the FLEXPART scheme were significantly underestimated. Moreover, the differences in FLEXPART TE depending on the measurement sites (0.95 for Baengnyeong, 0.94 for Gosan, and 0.87 for Noto) was not as large as the measured TE, suggesting that the regional differences in meteorological variables were relatively normalized and that the influence of other variables, which were not considered in the wet scavenging scheme, might be excluded in the calculation. Meanwhile, it is difficult to capture the local variation from coarse grid sizes, despite the air mass transport pathway between the two models being similar, because the key variables for determining the wet scavenging coefficient (such as precipitation, cloud cover, and so on) could have a large local variability. In addition, this approach still had a limitation in determining whether the overestimation of TE was resulting from the below- or in-cloud scavenging processes. Nevertheless, with similar rationale, further comparison of measured and ~~simulated~~ calculated scavenging coefficients ~~processes according to FLEXPART scheme~~ could provide information to better represent wet removal schemes.

### 3.4 Below-cloud scavenging efficiency ( $\Lambda_{\text{below}}$ )

From this section, we aimed to investigate the below- and in-cloud scavenging in detail by discriminating the representative cases according to cloud information from the ERA5 pressure level data with HYSPLIT backward trajectory to overcome the limitation of the local variability of meteorological input variables. By ~~considering~~ distinguishing the dominant cases for below- and in-cloud ~~vertical height of the air mass from the HYSPLIT model and cloud information from ERA5, we successfully distinguished the dominant cases for below cloud (no residence time within cloud) and in cloud (no residence time below cloud) cases, when precipitation  $\geq 0.01 \text{ mm hr}^{-1}$ , we compared our measured scavenging coefficients with those calculated according to FLEXPART scheme (not simulated).~~ The median measured TE and residence time for only in-cloud cases (0.72



and ~7,200 h) were much lower and longer, respectively, than those for only below-cloud cases (0.89 and ~5,100 h), indicating that in-cloud scavenging process is more efficient for wet removal of BC particle mass (Table 2). In the case of below-cloud scavenging, the deviation of TE from unity could be simply converted to the scavenging coefficient ( $\Lambda_{\text{below}}$ ) by considering the precipitation intensity, raindrop size, aerosol size, and residence time in a grid cell. Because many studies have made an effort to parameterize  $\Lambda_{\text{below}}$  using observation data and/or the theoretical calculations (Xu et al., 2017; Wang et al., 2014b; Feng, 2007), we also parameterized this coefficient using a simplified method by following the scheme of below-cloud scavenging in FLEXPART v10.4 (Laakso et al., 2003), which only considers the precipitation rate and aerosol size. Assuming a BC size ~200 nm, TE for below-cloud can be expressed using equations (2) and (3) by substituting  $\Lambda$  with  $\Lambda_{\text{below}}$ , which depends only on the precipitation rate in the subgrid cell ( $I_{\text{total}}$ ; the ratio of precipitation to  $f_g$ ). Because  $\Lambda_{\text{below}}$  can be determined by constraining the proportion to the summation of  $I_{\text{total}}$ , hourly  $\Lambda_{\text{below}}$  from the sequential grid cell in a single case can easily be obtained by minimizing  $\chi^2$ ,  $(\text{TE}_{\text{measured}} - \text{TE}_{\text{calculated}})^2$  when  $\chi^2 < 0.1$ . This was conducted using an R function for optimization (optim; <https://stat.ethz.ch/R-manual/R-devel/library/stats/html/optim.html>), included in the standard R package “stats”.

Figure 5a indicates the empirical cumulative density function for the measured  $\Lambda_{\text{below}}$  from 869 cases. Although a substantial fraction of  $\Lambda_{\text{below}}$  values were close to zero (or negative), the median  $\Lambda_{\text{below}}$  was significantly different from zero and also positive ( $7.9 \times 10^{-6} \text{ s}^{-1}$ ), with an interquartile range of  $-1.7 \times 10^{-5} \text{ s}^{-1}$  to  $5.3 \times 10^{-5} \text{ s}^{-1}$ . Negative  $\Lambda_{\text{below}}$  values have been reported in previous studies (Laakso et al., 2003; Pryor et al., 2016; Zikova and Zdimal, 2016); therefore, we assumed that these negative values reflected the uncertainty in measurements and/or inclusion of BC, which might be continuously supplemented in airmasses. As the threshold of  $I_{\text{total}}$  increased from 0.01 (all cases) to 0.2 mm hr<sup>-1</sup> (median),  $\Lambda_{\text{below}}$  values were increased by a factor of 2.5 to  $2.0 \times 10^{-5} \text{ s}^{-1}$  ( $-2.5 \times 10^{-5} \text{ s}^{-1}$  to  $9.0 \times 10^{-5} \text{ s}^{-1}$ ). Using these obvious increasing tendencies of  $\Lambda_{\text{below}}$  according to  $I_{\text{total}}$ , we determined the empirical fitting equation by investigating the relationship between median  $\Lambda_{\text{below}}$  and each bin of  $I_{\text{total}}$ . Figure 5b indicates  $\Lambda_{\text{below}}$  as a function of  $I_{\text{total}}$  based on allocation to 11 logarithmic bins. Because the estimated  $I_{\text{total}}$  bins covered the  $I_{\text{total}}$  ranges, 0.03 to 2.0 mm hr<sup>-1</sup> (5<sup>th</sup> percentile to 95<sup>th</sup> percentile), this exponential fitting equation ( $A \times I_{\text{total}}^B$ ) could be representative for below-cloud scavenging over East Asia. The constant A and exponent B with a 95% confidence interval were  $2.0 \times 10^{-5}$  ( $1.9\text{--}2.2 \times 10^{-5}$ ) and 0.54 (0.46–0.64), respectively. Instead of the SED equation shown in Figure 2, we chose the exponential fitting equation because of its higher R<sup>2</sup> (0.973) compared to that from SED fitting (0.903), as well as being widely used in previous studies.

Figure 6 shows a comparison of  $\Lambda_{\text{below}}$  ~~from reported values~~ calculated using equations from previous studies with ~~this study that derived using our equation~~ by assuming that the BC size was approximately 200 nm. To compare the measured  $\Lambda_{\text{below}}$ , we used the mean fractional bias (MFB;  $2 \times [A - B] / [A + B]$ ), where A and B denote  ~~$\Lambda_{\text{below}}$  of from calculated reported values~~ and this study measured  $\Lambda_{\text{below}}$  value, respectively. Our newly measured  $\Lambda_{\text{below}}$  values were located in the intermediate range of ~~reported-calculated~~  $\Lambda_{\text{below}}$ , and the mean deviations between the measured and all ~~reported-calculated~~ values were relatively constant with increasing  $I_{\text{total}}$  because the mean absolute MFBs were slightly increased from 1.4 to 1.6. It should be noted that  $\Lambda_{\text{below}}$  from Laakso et al. (2003), which is the default scheme for below-cloud scavenging in the FLEXPART model version 10 or higher (Grythe et al., 2017), showed fairly good agreement with our measured  $\Lambda_{\text{below}}$  among the calculated reported values (mean absolute MFB of 0.68). MFB was positive at low  $I_{\text{total}}$ , but the opposite tendency was observed for  $I_{\text{total}}$  at ~0.1 mm hr<sup>-1</sup>, suggesting that  $\Lambda_{\text{below}}$  might be converged within a similar range when we consider the range of  $I_{\text{total}}$ . Although calculated  $\Lambda_{\text{below}}$  from Laakso et al. (2003) showed good agreement with our results, the median calculated  $\Lambda_{\text{below}}$  ( $6.6 \times 10^{-6} \text{ s}^{-1}$ ) was overestimated compared to ~~our estimation~~ measured value ( $4.0 \times 10^{-6} \text{ s}^{-1}$ ), by a factor of 1.7 when we recalculated the only below-cloud cases. The MFBs from other schemes were too high or low to declare reasonable results. For example, the  $\Lambda_{\text{below}}$  of secondary ions in Beijing (Xu et al., 2017) had the highest MFB (1.68), and although the diameter ranges were larger

(~ 500 nm) than those of BC, the effect of differences in diameter might be negligible because significant difference in  $\Lambda_{\text{below}}$  between two diameters were not observed (less than 30%) when applied to Laakso et al. (2003).

### 3.5 In-cloud scavenging coefficient ( $\Lambda_{\text{in}}$ )

Compared to  $\Lambda_{\text{below}}$ , the calculation of  $\Lambda_{\text{in}}$  is much more complicated because many factors can influence the in-cloud scavenging process, such as precipitation, total cloud cover (TCC), the specific cloud total water content (CTWC), and so on. A detailed description for the complicated equation for  $\Lambda_{\text{in}}$  in FLEXPART v10 is presented in Grythe et al. (2017), and the equation for  $\Lambda_{\text{in}}$  can be simply expressed as follows:

$$\Lambda_{\text{in}} = \frac{i_{\text{cr}} \cdot F_{\text{nuc}} \cdot I_{\text{total}} \cdot TCC}{CTWC \cdot f_g} \quad (4)$$

where  $i_{\text{cr}}$  and  $F_{\text{nuc}}$  are the cloud water replenishment factor (6.2; default value) and the nucleation efficiency, respectively. It should be mentioned that  $\Lambda_{\text{in}}$  was also calculated by following the FLEXPART scheme using the ERA5 meteorological data (0.25°×0.25°) with HYSPLIT backward trajectory instead of the FLEXPART simulation (1°×1°) to reflect the local variability of meteorological variables~~match the grid size of the input data with the HYSPLIT backward trajectory~~. Among the 769 cases for in-cloud cases, equations (2) and (3) were also used to calculate TE for only in-cloud cases by substituting  $\Lambda$  with calculated  $\Lambda_{\text{in}}$ . Unlike the hourly measured  $\Lambda_{\text{below}}$  calculated by optimization, the only overall median  $\Lambda_{\text{in}}$  ( $\Lambda_{\text{in}}^*$ ) for in-cloud cases was calculated using equation (3) because  $\Lambda_{\text{in}}$  cannot be constrained by a specific variable.

The ~~FLEXPART-calculated~~  $\Lambda_{\text{in}}^*$  ( $7.28 \times 10^{-6} \text{ s}^{-1}$ ) from FLEXPART scheme (hereafter calculated  $\Lambda_{\text{in}}^*$ ) was underestimated by 1 order of magnitude compared to our ~~estimated-measured~~  $\Lambda_{\text{in}}^*$  ( $8.06 \times 10^{-5} \text{ s}^{-1}$ ). When ~~FLEXPART TE from FLEXPART~~ for in-cloud cases (all cases) was recalculated by considering a ten (five) times higher  $\Lambda_{\text{in}}$ , the median ~~FLEXPART~~ TE was 0.73 (0.79), which was much close to the measured TE (both 0.72). Although the grid size of input meteorological data for two approaches did not match, the underestimation of the in-cloud scavenging scheme in FLEXPART was confirmed. Grythe et al. (2017) reported an overestimation of observed BC (a factor of 1.68) due to inaccurate emission sources rather than the underestimated in-cloud removal efficiencies. Although the effect of BC particle dispersion to adjacent grid cells was neglected in our approach, the underestimation of in-cloud scavenging coefficients was obvious because the accuracy of the emission inventory did not affect the ~~estimated-measured~~  $\Lambda_{\text{in}}^*$ . Looking more closely into the sites, the calculated FLEXPART- $\Lambda_{\text{in}}^*$  at Noto was remarkably underestimated by 1 order of magnitude, followed by Gosan (~90%) and Baengnyeong (~43%), similar to the order of the wet removal efficiency. It should be noted that the coefficient of variation (CV; standard deviation divided by the mean) of calculated FLEXPART- $\Lambda_{\text{in}}^*$  was much lower (0.23) than the measured  $\Lambda_{\text{in}}^*$  (0.78), indicating that calculated FLEXPART- $\Lambda_{\text{in}}^*$  did not accurately represent the actual regional difference in the real world. Among the input meteorological variables in equation (4), the CV of  $I_{\text{total}}$  was the highest as 0.22, which was similar to the CV of calculated FLEXPART- $\Lambda_{\text{in}}^*$ , followed by CTWC (0.08),  $f_g$  (0.03), and TCC (0.02), suggesting that the difference in calculated FLEXPART- $\Lambda_{\text{in}}^*$  could be partially explained by  $I_{\text{total}}$  rather than other variables. Among the meteorological variables that were not considered in equation (4), the convective available potential energy (CAPE), which is well known as an indicator of vertical instability (Mori et al., 2014), had the highest CV of 0.31.

We employed an artificial neural network (ANN) to compare the importance of CAPE with other considered input meteorological variables for determining the hourly  $\Lambda_{\text{in}}$ , not  $\Lambda_{\text{in}}^*$ . We applied a stricter selection for in-cloud cases, i.e., only when in-cloud scavenging occurred less than three times (i.e., three cells) in a single case, regardless of the number of below-cloud occurrences. Because the effect of below-cloud scavenging was successfully excluded from the TE using the derived

equation for  $\Lambda_{\text{below}}$  in the previous section, the  $\Lambda_{\text{in}}$  in less than three in-cloud cases can also be calculated by optimization based on the remaining TE. We applied a threshold of three cases here because the number of data (230 cases) was sufficient to conduct statistical analysis, while the optimization uncertainty could be reduced to its minimum. The ANN model was trained using six meteorological variables (CAPE, CTWC,  $f_g$ ,  $F_{\text{nuc}}$ ,  $I_{\text{total}}$ , and TCC), and all variables were normalized by the minimum and maximum of each variable ( $[x - \min(x)] / [\max(x) - \min(x)]$ ). To determine the optimal node numbers in the hidden layer, we applied the ‘caret’ package of the R function that contains several sets of machine learning modes and validation tools (<https://cran.r-project.org/web/packages/caret/caret.pdf>) and adopted a method from the ‘neuralnet’ package that is fit for a multi-hidden layer. By varying the ‘size’ (node number) from 5 to 20 and using  $k$ -fold cross validation, the selected cases were randomly divided by a ratio of 3:1 into training (172 data points) and validation data (58 data points). Garson’s algorithm in the “NeuralNetTools” package was used to identify the relative importance of six input variables in the final neural network (Garson, 1991). The model’s performance was assessed in these independent validation data by calculating the root mean squared error. The optimal number of nodes in the hidden layer was 12 (Figure 7a).

Figure 7b shows the relative importance of input variables for calculating  $\Lambda_{\text{in}}$  using Garson’s algorithm. The most important input variable was CAPE, with a value of 35%, followed by CTWC,  $I_{\text{total}}$ , and so on, thus confirming that CAPE should be considered in the  $\Lambda_{\text{in}}$  calculation. Typically, enhancing wet removal by convective clouds successfully reduces the aloft BC concentration in the free troposphere (Koch et al., 2009). Therefore, convective process is important in tropical regions but has a slightly lower impact at mid-latitudes (Luo et al., 2019; Grythe et al., 2017; Xu et al., 2019). Moreover, previous studies have highlighted convective scavenging to be a key parameter in determining the BC concentration in model simulations (Lund et al., 2017; Xu et al., 2019) and the role of wet removal by convective clouds might be significant when most airmasses travel above the planetary boundary layer. Unfortunately, the current version of FLEXPART does not implement convective scavenging (Philipp and Seibert, 2018), which could be a plausible reason for the underestimation of calculated FLEXPART  $\Lambda_{\text{in}}$ . Although the relative importance of each variable cannot be parameterized to calculate  $\Lambda_{\text{in}}$ , this approach highlights that CAPE is one of the key factors for determining  $\Lambda_{\text{in}}$  over East Asia. In the future, more information might be required to evaluate the in-cloud scavenging scheme using Weather Research and Forecasting (WRF)-FLEXPART at a higher resolution in further studies since a 0.25° grid size is still not sufficient to reproduce convective clouds (typically 10 km or less).

## 4 Conclusions

The wet removal rates and scavenging coefficients for BC were investigated by the term of  $\Delta\text{BC}/\Delta\text{CO}$  ratios from long-term, best-effort observations at three remote sites in East Asia (Baengnyeong and Gosan in South Korea and Noto in Japan). By combining the backward trajectories covering the past 72 h, the accumulated precipitation along trajectories (APT), and transport efficiency (TE;  $[\Delta\text{BC}/\Delta\text{CO}]_{\text{APT}>0} / [\Delta\text{BC}/\Delta\text{CO}]_{\text{APT}=0}$ ), BC wet removal efficiency was assessed as an aspect of the pathway of trajectories, including the successful identification of below- and in-cloud cases. The overall wet removal rates as a function of APT, the half-life and  $e$ -folding lifetime were similar to those of previous studies but showed large regional differences depending on the measurement site. The difference in the wet removal rate, depending on the measurement site, can be explained by the different meteorological conditions, such as the precipitation rate, cloud cover, total column cloud water, and cloud bottom height. The differences in regional and seasonal wet removal rates ~~could be explained~~ might be influenced by the frequency of exposure to below- and in-cloud scavenging condition during transport as well as the magnitude of aging process causing the different coating thicknesses ~~the different coating thicknesses according to the BC emission sources (thin and thick coated BC from the industrial and residential sectors, respectively)~~ because the thick-coated BC particles are preferentially removed due to cloud processes. By discriminating below- and in-cloud dominant cases according

to cloud vertical information from ERA5 pressure level data, scavenging coefficients for below-cloud ( $\Lambda_{\text{below}}$ ) and in-cloud ( $\Lambda_{\text{in}}^*$ ) were simply converted from the measured TE values. The calculated  $\Lambda_{\text{below}}$  from the FLEXPART scheme was overestimated by a factor of 1.7 compared to the measured  $\Lambda_{\text{below}}$ , although the measured  $\Lambda_{\text{below}}$  showed good agreement with the below-cloud scheme in FLEXPART among the reported scavenging coefficients. In contrast to  $\Lambda_{\text{below}}$ , the calculated FLEXPART  $\Lambda_{\text{in}}^*$  from FLEXPART scheme was highly underestimated by 1 order of magnitude compared to measured  $\Lambda_{\text{in}}^*$ , suggesting that the current in-cloud scavenging scheme did not represent regional variability. By diagnosing the relative importance of the input variables using the artificial neuron network (ANN), we found that the convective available potential energy (CAPE), which is an indicator of vertical instability, should be considered to improve the in-cloud scavenging scheme because convective scavenging could be regarded as a key parameter for determining the accurate BC concentration in a model. This study could contribute not only to improving the below-cloud scavenging scheme implemented in a model, especially FLEXPART, but also to providing evidence for complementary in-cloud scavenging schemes by considering the convective scavenging process. For the first time, these results suggest a novel and straightforward approach to evaluating the wet scavenging scheme in various models and to enhancing the understanding of BC behavior by excluding the effects of inaccurate emission inventories.

#### 481 **Author contributions.**

YC and YK designed the study and prepared the paper, with contributions from all co-authors. YC, MT, and CZ optimized the FLEXPART model and revised the paper. YC conducted the FLEXPART model simulations and performed the analyses. SMP was responsible for measurements at Baengnyeong. AM and YS conducted measurements at Noto, and SWK contributed to ground observations and quality control at Gosan. XP and IP contributed to the data analysis. All co-authors provided professional comments to improve the paper.

#### 487 **Competing interests.**

The authors declare that they have no conflicts of interest.

#### 489 **Code/Data availability.**

The observational data set for BC and CO are available upon request to the corresponding author.

#### 491 **Acknowledgments.**

The authors thank NOAA ARL and ECMWF for providing the HYSPLIT model and ERA5 meteorological data. We also thank anonymous reviewers for precise and valuable comments that greatly improved the manuscript.

#### 494 **Financial support.**

This research has been supported by the Environment Research and Technology Development Fund of the Ministry of the Environment, Japan (grant no. 2-1803).

## References

- Andronache, C.: Estimated variability of below-cloud aerosol removal by rainfall for observed aerosol size distributions, *Atmos. Chem. Phys.*, 3, 131-143, 10.5194/acp-3-131-2003, 2003.
- Ashbaugh, L. L., Malm, W. C., and Sadeh, W. Z.: A residence time probability analysis of sulfur concentrations at grand Canyon National Park, *Atmos. Environ.*, 19, 1263-1270, [https://doi.org/10.1016/0004-6981\(85\)90256-2](https://doi.org/10.1016/0004-6981(85)90256-2), 1985.
- Baklanov, A., and Sørensen, J. H.: Parameterisation of radionuclide deposition in atmospheric long-range transport modelling, *Physics and Chemistry of the Earth, Part B: Hydrology, Oceans and Atmosphere*, 26, 787-799, [https://doi.org/10.1016/S1464-1909\(01\)00087-9](https://doi.org/10.1016/S1464-1909(01)00087-9), 2001.
- Bond, T. C., Anderson, T. L., and Campbell, D.: Calibration and Intercomparison of Filter-Based Measurements of Visible Light Absorption by Aerosols, *Aerosol Sci. Technol.*, 30, 582–600, <https://doi.org/10.1080/027868299304435>, 1999.
- Bond, T. C., Doherty, S. J., Fahey, D., Forster, P., Berntsen, T., DeAngelo, B., Flanner, M., Ghan, S., Kärcher, B., and Koch, D.: Bounding the role of black carbon in the climate system: A scientific assessment, *J. Geophys. Res. Atmos.*, 118, 5380-5552, 2013.
- Choi, Y., Kanaya, Y., Park, S. M., Matsuki, A., Sadanaga, Y., Kim, S. W., Uno, I., Pan, X., Lee, M., Kim, H., and Jung, D. H.: Regional variability in black carbon and carbon monoxide ratio from long-term observations over East Asia: assessment of representativeness for black carbon (BC) and carbon monoxide (CO) emission inventories, *Atmos. Chem. Phys.*, 20, 83-98, 10.5194/acp-20-83-2020, 2020.
- Chung, S. H., and Seinfeld, J. H.: Global distribution and climate forcing of carbonaceous aerosols, *Journal of Geophysical Research: Atmospheres*, 107, AAC 14-11-AAC 14-33, 10.1029/2001jd001397, 2002.
- Cooke, W. F., and Wilson, J. J. N.: A global black carbon aerosol model, *Journal of Geophysical Research: Atmospheres*, 101, 19395-19409, 10.1029/96jd00671, 1996.
- Crippa, M., Guizzardi, D., Muntean, M., Schaaf, E., Dentener, F., van Aardenne, J. A., Monni, S., Doering, U., Olivier, J. G. J., Pagliari, V., and Janssens-Maenhout, G.: Gridded emissions of air pollutants for the period 1970–2012 within EDGAR v4.3.2, *Earth Syst. Sci. Data*, 10, 1987–2013, 10.5194/essd-10-1987-2018, 2018.
- Croft, B., Lohmann, U., Martin, R. V., Stier, P., Wurzler, S., Feichter, J., Hoose, C., Heikkilä, U., van Donkelaar, A., and Ferrachat, S.: Influences of in-cloud aerosol scavenging parameterizations on aerosol concentrations and wet deposition in ECHAM5-HAM, *Atmos. Chem. Phys.*, 10, 1511-1543, 10.5194/acp-10-1511-2010, 2010.
- Draxler, R., Stunder, B., Rolph, G., Stein, A., and Taylor, A.: HYSPLIT4 User's Guide Version 4-Last Revision: February 2018, HYSPLIT Air Resources Laboratory, MD, USA, 2018.
- Ding, S., Zhao, D., He, C., Huang, M., He, H., Tian, P., Liu, Q., Bi, K., Yu, C., Pitt, J., Chen, Y., Ma, X., Chen, Y., Jia, X., Kong, S., Wu, J., Hu, D., Hu, K., Ding, D., and Liu, D.: Observed Interactions Between Black Carbon and Hydrometeor During Wet Scavenging in Mixed-Phase Clouds, *Geophysical Research Letters*, 46, 8453-8463, 10.1029/2019gl083171, 2019.
- Eck, T. F., Holben, B. N., Reid, J. S., Xian, P., Giles, D. M., Sinyuk, A., Smirnov, A., Schafer, J. S., Slutsker, I., Kim, J., Koo, J. H., Choi, M., Kim, K. C., Sano, I., Arola, A., Sayer, A. M., Levy, R. C., Munchak, L. A., O'Neill, N. T., Lyapustin, A., Hsu, N. C., Randles, C. A., Da Silva, A. M., Buchar, V., Govindaraju, R. C., Hyer, E., Crawford, J. H., Wang, P., and Xia, X.: Observations of the Interaction and Transport of Fine Mode Aerosols With Cloud and/or Fog in Northeast Asia From Aerosol Robotic Network and Satellite Remote Sensing, *Journal of Geophysical Research: Atmospheres*, 0, 10.1029/2018JD028313, 2018.
- Emmons, L. K., Walters, S., Hess, P. G., Lamarque, J. F., Pfister, G. G., Fillmore, D., Granier, C., Guenther, A., Kinnison, D., Laepple, T., Orlando, J., Tie, X., Tyndall, G., Wiedinmyer, C., Baughcum, S. L., and Kloster, S.: Description and evaluation of the Model for Ozone and Related chemical Tracers, version 4 (MOZART-4), *Geosci. Model Dev.*, 3, 43-67, 10.5194/gmd-3-43-2010, 2010.
- Emerson, E. W., Katich, J. M., Schwarz, J. P., McMeeking, G. R., and Farmer, D. K.: Direct Measurements of Dry and Wet Deposition of Black Carbon Over a Grassland, *J. Geophys. Res. Atmos.*, 123, 12,277-212,290, 10.1029/2018JD028954, 2018.
- Feng, J.: A 3-mode parameterization of below-cloud scavenging of aerosols for use in atmospheric dispersion models, *Atmos. Environ.*, 41, 6808-6822, <https://doi.org/10.1016/j.atmosenv.2007.04.046>, 2007.
- Garson, G. D.: Interpreting neural-network connection weights, *Artif. Intell. Expert*, 6, 46–51, 1991.
- Grythe, H., Kristiansen, N. I., Groot Zwaaftink, C. D., Eckhardt, S., Ström, J., Tunved, P., Krejci, R., and Stohl, A.: A new aerosol wet removal scheme for the Lagrangian particle model FLEXPART v10, *Geosci. Model Dev.*, 10, 1447-1466, 10.5194/gmd-10-1447-2017, 2017.
- Guo, Q., Hu, M., Guo, S., Wu, Z., Peng, J., and Wu, Y.: The variability in the relationship between black carbon and carbon monoxide over the eastern coast of China: BC aging during transport, *Atmos. Chem. Phys.*, 17, 10395–10403, <https://doi.org/10.5194/acp-17-10395-2017>, 2017.
- Han, C., Li, S. M., Liu, P., and Lee, P.: Size Dependence of the Physical Characteristics of Particles Containing Refractory Black Carbon in Diesel Vehicle Exhaust, *Environmental Science & Technology*, 53, 137–145, 10.1021/acs.est.8b04603,



- [2019-Hoffmann, L., Günther, G., Li, D., Stein, O., Wu, X., Griessbach, S., Heng, Y., Konopka, P., Müller, R., Vogel, B., and Wright, J. S.: From ERA-Interim to ERA5: the considerable impact of ECMWF's next-generation reanalysis on Lagrangian transport simulations, \*Atmos. Chem. Phys.\*, \*\*19\*\*, 3097–3124, <https://doi.org/10.5194/acp-19-3097-2019>, 2019.](#)
- Jylhä, K.: Empirical scavenging coefficients of radioactive substances released from chernobyl, *Atmospheric Environment. Part A. General Topics*, **25**, 263–270, [https://doi.org/10.1016/0960-1686\(91\)90297-K](https://doi.org/10.1016/0960-1686(91)90297-K), 1991.
- [Kanaya, Y., Komazaki, Y., Pochanart, P., Liu, Y., Akimoto, H., Gao, J., Wang, T., and Wang, Z.: Mass concentrations of black carbon measured by four instruments in the middle of Central East China in June 2006, \*Atmos. Chem. Phys.\*, \*\*8\*\*, 7637–7649, <https://doi.org/10.5194/acp-8-7637-2008>, 2008.](#)
- Kanaya, Y., Taketani, F., Komazaki, Y., Liu, X., Kondo, Y., Sahu, L. K., Irie, H., and Takashima, H.: Comparison of Black Carbon Mass Concentrations Observed by Multi-Angle Absorption Photometer (MAAP) and Continuous Soot-Monitoring System (COSMOS) on Fukue Island and in Tokyo, Japan, *Aerosol Sci. Technol.*, **47**, 1–10, [10.1080/02786826.2012.716551](https://doi.org/10.1080/02786826.2012.716551), 2013.
- Kanaya, Y., Pan, X., Miyakawa, T., Komazaki, Y., Taketani, F., Uno, I., and Kondo, Y.: Long-term observations of black carbon mass concentrations at Fukue Island, western Japan, during 2009–2015: constraining wet removal rates and emission strengths from East Asia, *Atmos. Chem. Phys.*, **16**, 10689–10705, [10.5194/acp-16-10689-2016](https://doi.org/10.5194/acp-16-10689-2016), 2016.
- Kanaya, Y., Yamaji, K., Miyakawa, T., Taketani, F., Zhu, C., Choi, Y., Komazaki, Y., Ikeda, K., Kondo, Y., and Klimont, Z.: Rapid reduction of black carbon emissions from China: evidence from 2009–2019 observations on Fukue Island, Japan, *Atmos. Chem. Phys.*, **20**, 6339–6356, <https://doi.org/10.5194/acp-20-6339-2020>, 2020. *Atmos. Chem. Phys. Discuss.*, **2019**, 1–28, [10.5194/acp-2019-1054](https://doi.org/10.5194/acp-2019-1054), 2019.–
- [Koch, D., and Hansen, J.: Distant origins of Arctic black carbon: A Goddard Institute for Space Studies ModelE experiment, \*Journal of Geophysical Research: Atmospheres\*, \*\*110\*\*, \[10.1029/2004jd005296\]\(https://doi.org/10.1029/2004jd005296\), 2005.](#)
- Koch, D., Schulz, M., Kinne, S., McNaughton, C., Spackman, J. R., Balkanski, Y., Bauer, S., Bernsten, T., Bond, T. C., Boucher, O., Chin, M., Clarke, A., De Luca, N., Dentener, F., Diehl, T., Dubovik, O., Easter, R., Fahey, D. W., Feichter, J., Fillmore, D., Freitag, S., Ghan, S., Ginoux, P., Gong, S., Horowitz, L., Iversen, T., Kirkev, aring, g, A., Klimont, Z., Kondo, Y., Krol, M., Liu, X., Miller, R., Montanaro, V., Moteki, N., Myhre, G., Penner, J. E., Perlwitz, J., Pitari, G., Reddy, S., Sahu, L., Sakamoto, H., Schuster, G., Schwarz, J. P., Seland, Ø., Stier, P., Takegawa, N., Takemura, T., Textor, C., van Aardenne, J. A., and Zhao, Y.: Evaluation of black carbon estimations in global aerosol models, *Atmos. Chem. Phys.*, **9**, 9001–9026, [10.5194/acp-9-9001-2009](https://doi.org/10.5194/acp-9-9001-2009), 2009.
- Kondo, Y., Moteki, N., Oshima, N., Ohata, S., Koike, M., Shibano, Y., Takegawa, N., and Kita, K.: Effects of wet deposition on the abundance and size distribution of black carbon in East Asia, *J. Geophys. Res. Atmos.*, **121**, 4691–4712, [10.1002/2015JD024479](https://doi.org/10.1002/2015JD024479), 2016.
- Kurokawa, J., Ohara, T., Morikawa, T., Hanayama, S., Janssens-Maenhout, G., Fukui, T., Kawashima, K., and Akimoto, H.: Emissions of air pollutants and greenhouse gases over Asian regions during 2000–2008: Regional Emission inventory in ASia (REAS) version 2, *Atmos. Chem. Phys.*, **13**, 11019–11058, [10.5194/acp-13-11019-2013](https://doi.org/10.5194/acp-13-11019-2013), 2013.
- Kuwata, M., Kondo, Y., Mochida, M., Takegawa, N., and Kawamura, K.: Dependence of CCN activity of less volatile particles on the amount of coating observed in Tokyo, *Journal of Geophysical Research: Atmospheres*, **112**, [10.1029/2006jd007758](https://doi.org/10.1029/2006jd007758), 2007.
- Laakso, L., Grönholm, T., Rannik, Ü., Kosmale, M., Fiedler, V., Vehkamäki, H., and Kulmala, M.: Ultrafine particle scavenging coefficients calculated from 6 years field measurements, *Atmos. Environ.*, **37**, 3605–3613, [https://doi.org/10.1016/S1352-2310\(03\)00326-1](https://doi.org/10.1016/S1352-2310(03)00326-1), 2003.
- Lamb, K. D., Perring, A. E., Samset, B., Peterson, D., Davis, S., Anderson, B. E., Beyersdorf, A., Blake, D. R., Campuzano-Jost, P., Corr, C. A., Diskin, G. S., Kondo, Y., Moteki, N., Nault, B. A., Oh, J., Park, M., Pusede, S. E., Simpson, I. J., Thornhill, K. L., Wisthaler, A., and Schwarz, J. P.: Estimating Source Region Influences on Black Carbon Abundance, Microphysics, and Radiative Effect Observed Over South Korea, *J. Geophys. Res. Atmos.*, **123**, 13,527–513,548, [doi:10.1029/2018JD029257](https://doi.org/10.1029/2018JD029257), 2018.
- Lee, Y. H., Lamarque, J. F., Flanner, M. G., Jiao, C., Shindell, D. T., Bernsten, T., Bisiaux, M. M., Cao, J., Collins, W. J., Curran, M., Edwards, R., Faluvegi, G., Ghan, S., Horowitz, L. W., McConnell, J. R., Ming, J., Myhre, G., Nagashima, T., Naik, V., Rumbold, S. T., Skeie, R. B., Sudo, K., Takemura, T., Thevenon, F., Xu, B., and Yoon, J. H.: Evaluation of preindustrial to present-day black carbon and its albedo forcing from Atmospheric Chemistry and Climate Model Intercomparison Project (ACCMIP), *Atmos. Chem. Phys.*, **13**, 2607–2634, [10.5194/acp-13-2607-2013](https://doi.org/10.5194/acp-13-2607-2013), 2013.
- [Li, M., Zhang, Q., Kurokawa, J. I., Woo, J. H., He, K., Lu, Z., Ohara, T., Song, Y., Streets, D. G., Carmichael, G. R., Cheng, Y., Hong, C., Huo, H., Jiang, X., Kang, S., Liu, F., Su, H., and Zheng, B.: MIX: a mosaic Asian anthropogenic emission inventory under the international collaboration framework of the MICS Asia and HTAP, \*Atmos. Chem. Phys.\*, \*\*17\*\*, 935–963, \[10.5194/acp-17-935-2017\]\(https://doi.org/10.5194/acp-17-935-2017\), 2017.](#)
- Li, S., Park, S., Park, M.-K., Jo, C. O., Kim, J.-Y., Kim, J.-Y., and Kim, K.-R.: Statistical Back Trajectory Analysis for Estimation of CO<sub>2</sub> Emission Source Regions, *Atmosphere*, **24**, 245–251, 2014 (Abstract in English).
- [Liu, D., Joshi, R., Wang, J., Yu, C., Allan, J. D., Coe, H., Flynn, M. J., Xie, C., Lee, J., Squires, F., Kotthaus, S., Grimmond, S., Ge, X., Sun, Y., and Fu, P.: Contrasting physical properties of black carbon in urban Beijing between winter and summer, \*Atmos. Chem. Phys.\*, \*\*19\*\*, 6749–6769, \[10.5194/acp-19-6749-2019\]\(https://doi.org/10.5194/acp-19-6749-2019\), 2019.](#)
- Liu, L., Zhang, J., Xu, L., Yuan, Q., Huang, D., Chen, J., Shi, Z., Sun, Y., Fu, P., Wang, Z., Zhang, D., and Li, W.: Cloud scavenging of anthropogenic refractory particles at a mountain site in North China, *Atmos. Chem. Phys.*, **18**, 14681–14693, 2018.

- 10.5194/acp-18-14681-2018, 2018.
- Lund, M. T., Berntsen, T. K., and Samset, B. H.: Sensitivity of black carbon concentrations and climate impact to aging and scavenging in OsloCTM2–M7, *Atmos. Chem. Phys.*, 17, 6003–6022, 10.5194/acp-17-6003-2017, 2017.
- Lund, M. T., Samset, B. H., Skeie, R. B., Watson-Parris, D., Katich, J. M., Schwarz, J. P., and Weinzierl, B.: Short Black Carbon lifetime inferred from a global set of aircraft observations, *npj Climate and Atmospheric Science*, 1, 31, 10.1038/s41612-018-0040-x, 2018.
- Luo, G., Yu, F., and Schwab, J.: Revised treatment of wet scavenging processes dramatically improves GEOS-Chem 12.0.0 simulations of surface nitric acid, nitrate, and ammonium over the United States, *Geosci. Model Dev.*, 12, 3439–3447, 10.5194/gmd-12-3439-2019, 2019.
- Matsui, H., Koike, M., Kondo, Y., Moteki, N., Fast, J. D., and Zaveri, R. A.: Development and validation of a black carbon mixing state resolved three-dimensional model: Aging processes and radiative impact, *J. Geophys. Res. Atmos.*, 118, 2304–2326, 10.1029/2012jd018446, 2013.
- Matsui, H., Hamilton, D. S., and Mahowald, N. M.: Black carbon radiative effects highly sensitive to emitted particle size when resolving mixing-state diversity, *Nature Communications*, 9, 3446, 10.1038/s41467-018-05635-1, 2018.
- Miyakawa, T., Kanaya, Y., Komazaki, Y., Taketani, F., Pan, X., Irwin, M., and Symonds, J.: Intercomparison between a single particle soot photometer and evolved gas analysis in an industrial area in Japan: Implications for the consistency of soot aerosol mass concentration measurements, *Atmos. Environ.*, 127, 14–21, <https://doi.org/10.1016/j.atmosenv.2015.12.018>, 2016.
- Miyakawa, T., Oshima, N., Taketani, F., Komazaki, Y., Yoshino, A., Takami, A., Kondo, Y., and Kanaya, Y.: Alteration of the size distributions and mixing states of black carbon through transport in the boundary layer in east Asia, *Atmos. Chem. Phys.*, 17, 5851–5864, 10.5194/acp-17-5851-2017, 2017.
- Mori, T., Kondo, Y., Ohata, S., Moteki, N., Matsui, H., Oshima, N., and Iwasaki, A.: Wet deposition of black carbon at a remote site in the East China Sea, *J. Geophys. Res. Atmos.*, 119, 10485–10498, 10.1002/2014jd022103, 2014.
- Moteki, N., Kondo, Y., Miyazaki, Y., Takegawa, N., Komazaki, Y., Kurata, G., Shirai, T., Blake, D. R., Miyakawa, T., and Koike, M.: Evolution of mixing state of black carbon particles: Aircraft measurements over the western Pacific in March 2004, *Geophysical Research Letters*, 34, 10.1029/2006gl028943, 2007.
- Moteki, N., Kondo, Y., Oshima, N., Takegawa, N., Koike, M., Kita, K., Matsui, H., and Kajino, M.: Size dependence of wet removal of black carbon aerosols during transport from the boundary layer to the free troposphere, *Geophysical Research Letters*, 39, 10.1029/2012gl052034, 2012.
- Myhre, G., Shindell, D., Bréon, F.-M., Collins, W., Fuglestad, J., Huang, J., Koch, D., Lamarque, J.-F., Lee, D., and Mendoza, B. J. C. c.: Anthropogenic and natural radiative forcing, 423, 658–740, 2013.
- Ogren, J. A., Wendell, J., Andrews, E., and Sheridan, P. J.: Continuous light absorption photometer for long-term studies, *Atmos. Meas. Tech.*, 10, 4805–4818, 10.5194/amt-10-4805-2017, 2017.
- Oh, J., Park, J.-S., Ahn, J.-Y., Choi, J.-S., Lim, J.-H., Kim, H.-J., Han, J.-S., Hong, Y.-D., and Lee, G.-W.: A study on the Behavior of the Black Carbon at Baengnyeong Island of Korea Peninsular, *J. Korean Soc. Urban Environ.*, 14, 67–76, 2014 (Abstract in English).
- Oh, J., Park, J., Lee, S., Ahn, J., Choi, J., Lee, S., Lee, Y., Kim, H., Hong, Y., Hong, J., Kim, J., Kim, S., and Lee, G.-W.: Characteristics of Black Carbon Particles in Ambient Air Using a Single Particle Soot Photometer (SP2) in May 2013, Jeju, Korea, *J. Korean Soc. Atmos.*, 32, 255–268, 2015 (Abstract in English).
- Ohata, S., Kondo, Y., Moteki, N., Mori, T., Yoshida, A., Sinha, P. R., and Koike, M.: Accuracy of black carbon measurements by a filter-based absorption photometer with a heated inlet, *Aerosol Science and Technology*, 53, 1079–1091, 10.1080/02786826.2019.1627283, 2019.
- Oshima, N., Kondo, Y., Moteki, N., Takegawa, N., Koike, M., Kita, K., Matsui, H., Kajino, M., Nakamura, H., Jung, J. S., and Kim, Y. J.: Wet removal of black carbon in Asian outflow: Aerosol Radiative Forcing in East Asia (A-FORCE) aircraft campaign, *J. Geophys. Res. Atmos.*, 117, 10.1029/2011JD016552, 2012.
- Park, J., Song, I., Kim, H., Lim, H., Park, S., Shin, S., Shin, H., Lee, S., and Kim, J.: The Characteristics of Black Carbon of Seoul, *J. Environ. Impact Assess.*, 28, 113–128, 10.14249/EIA.2019.28.2.113, 2019 (Abstract in English).
- Park, R. J., Jacob, D. J., Palmer, P. I., Clarke, A. D., Weber, R. J., Zondlo, M. A., Eisele, F. L., Bandy, A. R., Thornton, D. C., Sachse, G. W., and Bond, T. C.: Export efficiency of black carbon aerosol in continental outflow: Global implications, *J. Geophys. Res.-Atmos.*, 110, 1–7, <https://doi.org/10.1029/2004JD005432>, 2005.
- Philipp, A., and Seibert, P.: Scavenging and Convective Clouds in the Lagrangian Dispersion Model FLEXPART, in: *Air Pollution Modeling and its Application XXV*, Cham, 2018, 335–340.
- Pisso, I., Sollum, E., Grythe, H., Kristiansen, N. I., Cassiani, M., Eckhardt, S., Arnold, D., Morton, D., Thompson, R. L., Groot Zwaaftink, C. D., Evangelou, N., Sodemann, H., Haimberger, L., Henne, S., Brunner, D., Burkhart, J. F., Fouilloux, A., Brioude, J., Philipp, A., Seibert, P., and Stohl, A.: The Lagrangian particle dispersion model FLEXPART version 10.4, *Geosci. Model Dev.*, 12, 4955–4997, 10.5194/gmd-12-4955-2019, 2019.
- Pryor, S. C., Joerger, V. M., and Sullivan, R. C.: Empirical estimates of size-resolved precipitation scavenging coefficients for ultrafine particles, *Atmos. Environ.*, 143, 133–138, <https://doi.org/10.1016/j.atmosenv.2016.08.036>, 2016.
- Samset, B. H., Myhre, G., Herber, A., Kondo, Y., Li, S. M., Moteki, N., Koike, M., Oshima, N., Schwarz, J. P., Balkanski, Y., Bauer, S. E., Bellouin, N., Berntsen, T. K., Bian, H., Chin, M., Diehl, T., Easter, R. C., Ghan, S. J., Iversen, T., Kirkevåg, A., Lamarque, J. F., Lin, G., Liu, X., Penner, J. E., Schulz, M., Seland, Ø., Skeie, R. B., Stier, P., Takemura, T., Tsigaridis,

- K., and Zhang, K.: Modelled black carbon radiative forcing and atmospheric lifetime in AeroCom Phase II constrained by aircraft observations, *Atmos. Chem. Phys.*, 14, 12465-12477, 10.5194/acp-14-12465-2014, 2014.
- [Schwarz, J. P., Spackman, J. R., Gao, R. S., Watts, L. A., Stier, P., Schulz, M., Davis, S. M., Wofsy, S. C., and Fahey, D. W.: Global-scale black carbon profiles observed in the remote atmosphere and compared to models, \*Geophysical Research Letters\*, 37, 10.1029/2010gl044372, 2010.](#)
- [Sharma, S., Ishizawa, M., Chan, D., Lavoué, D., Andrews, E., Eleftheriadis, K., and Maksyutov, S.: 16-year simulation of Arctic black carbon: Transport, source contribution, and sensitivity analysis on deposition, \*Journal of Geophysical Research: Atmospheres\*, 118, 943-964, 10.1029/2012jd017774, 2013.](#)
- Sparmacher, H., Fülber, K., and Bonka, H.: Below-cloud scavenging of aerosol particles: Particle-bound radionuclides—Experimental, *Atmospheric Environment. Part A. General Topics*, 27, 605-618, [https://doi.org/10.1016/0960-1686\(93\)90218-N](https://doi.org/10.1016/0960-1686(93)90218-N), 1993.
- [Stier, P., Seinfeld, J. H., Kinne, S., and Boucher, O.: Aerosol absorption and radiative forcing, \*Atmos. Chem. Phys.\*, 7, 5237-5261, 10.5194/acp-7-5237-2007, 2007.](#)
- Stohl, A., Forster, C., Frank, A., Seibert, P., and Wotawa, G.: Technical note: The Lagrangian particle dispersion model FLEXPART version 6.2, *Atmos. Chem. Phys.*, 5, 2461-2474, 10.5194/acp-5-2461-2005, 2005.
- [Taketani, F., Kanaya, Y., Nakayama, T., Ueda, S., Matsumi, Y., Sadanaga, Y., Iwamoto, Y., and Matsuki, A.: Property of Black Carbon Particles Measured by a Laser-Induced Incandescence Technique in the spring at Noto Peninsula, Japan, \*J. Aerosol Res.\*, 31, 194–202, <https://doi.org/10.11203/jar.31.194>, 2016 \(Abstract in English\).](#)
- Textor, C., Schulz, M., Guibert, S., Kinne, S., Balkanski, Y., Bauer, S., Berntsen, T., Berglen, T., Boucher, O., Chin, M., Dentener, F., Diehl, T., Easter, R., Feichter, H., Fillmore, D., Ghan, S., Ginoux, P., Gong, S., Grini, A., Hendricks, J., Horowitz, L., Huang, P., Isaksen, I., Iversen, I., Kloster, S., Koch, D., Kirkevåg, A., Kristjansson, J. E., Krol, M., Lauer, A., Lamarque, J. F., Liu, X., Montanaro, V., Myhre, G., Penner, J., Pitari, G., Reddy, S., Seland, Ø., Stier, P., Takemura, T., and Tie, X.: Analysis and quantification of the diversities of aerosol life cycles within AeroCom, *Atmos. Chem. Phys.*, 6, 1777-1813, 10.5194/acp-6-1777-2006, 2006.
- Ueda, S., Nakayama, T., Taketani, F., Adachi, K., Matsuki, A., Iwamoto, Y., Sadanaga, Y., and Matsumi, Y.: Light absorption and morphological properties of soot-containing aerosols observed at an East Asian outflow site, Noto Peninsula, Japan, *Atmos. Chem. Phys.*, 16, 2525-2541, 10.5194/acp-16-2525-2016, 2016.
- [Vignati, E., Karl, M., Krol, M., Wilson, J., Stier, P., and Cavalli, F.: Sources of uncertainties in modelling black carbon at the global scale, \*Atmos. Chem. Phys.\*, 10, 2595-2611, 10.5194/acp-10-2595-2010, 2010.](#)
- Wang, Q., Jacob, D. J., Spackman, J. R., Perring, A. E., Schwarz, J. P., Moteki, N., Marais, E. A., Ge, C., Wang, J., and Barrett, S. R. H.: Global budget and radiative forcing of black carbon aerosol: Constraints from pole-to-pole (HIPPO) observations across the Pacific, *Journal of Geophysical Research: Atmospheres*, 119, 195-206, 10.1002/2013jd020824, 2014a.
- Wang, X., Zhang, L., and Moran, M. D.: Development of a new semi-empirical parameterization for below-cloud scavenging of size-resolved aerosol particles by both rain and snow, *Geosci. Model Dev.*, 7, 799-819, 10.5194/gmd-7-799-2014, 2014b.
- Winiger, P., Andersson, A., Eckhardt, S., Stohl, A., and Gustafsson, Ö.: The sources of atmospheric black carbon at a European gateway to the Arctic, *Nature Communications*, 7, 12776, 10.1038/ncomms12776, 2016.
- Xu, D., Ge, B., Wang, Z., Sun, Y., Chen, Y., Ji, D., Yang, T., Ma, Z., Cheng, N., Hao, J., and Yao, X.: Below-cloud wet scavenging of soluble inorganic ions by rain in Beijing during the summer of 2014, *Environmental Pollution*, 230, 963-973, <https://doi.org/10.1016/j.envpol.2017.07.033>, 2017.
- Xu, J., Zhang, J., Liu, J., Yi, K., Xiang, S., Hu, X., Wang, Y., Tao, S., and Ban-Weiss, G.: Influence of cloud microphysical processes on black carbon wet removal, global distributions, and radiative forcing, *Atmos. Chem. Phys.*, 19, 1587-1603, 10.5194/acp-19-1587-2019, 2019.
- [Zhang, Y., Li, M., Cheng, Y., Geng, G., Hong, C., Li, H., Li, X., Tong, D., Wu, N., Zhang, X., Zheng, B., Zheng, Y., Bo, Y., Su, H., and Zhang, Q.: Modeling the aging process of black carbon during atmospheric transport using a new approach: a case study in Beijing, \*Atmos. Chem. Phys.\*, 19, 9663-9680, 10.5194/acp-19-9663-2019, 2019.](#)
- Zheng, B., Tong, D., Li, M., Liu, F., Hong, C., Geng, G., Li, H., Li, X., Peng, L., Qi, J., Yan, L., Zhang, Y., Zhao, H., Zheng, Y., He, K., and Zhang, Q.: Trends in China's anthropogenic emissions since 2010 as the consequence of clean air actions, *Atmos. Chem. Phys.*, 18, 14095-14111, 10.5194/acp-18-14095-2018, 2018.
- [Zhou, X., Gao, J., Wang, T., Wu, W., and Wang, W.: Measurement of black carbon aerosols near two Chinese megacities and the implications for improving emission inventories, \*Atmos. Environ.\*, 43, 3918–3924, <https://doi.org/10.1016/j.atmosenv.2009.04.062>, 2009.](#)
- Zhu, C., Kanaya, Y., Takigawa, M., Ikeda, K., Tanimoto, H., Taketani, F., Miyakawa, T., Kobayashi, H., and Pissio, I.: FLEXPART v10.1 simulation of source contributions to Arctic black carbon, *Atmos. Chem. Phys.*, 20, 1641-1656, 10.5194/acp-20-1641-2020, 2020.
- Zikova, N., and Zdimal, V.: Precipitation scavenging of aerosol particles at a rural site in the Czech Republic, *Tellus B: Chemical and Physical Meteorology*, 68, 27343, 10.3402/tellusb.v68.27343, 2016.



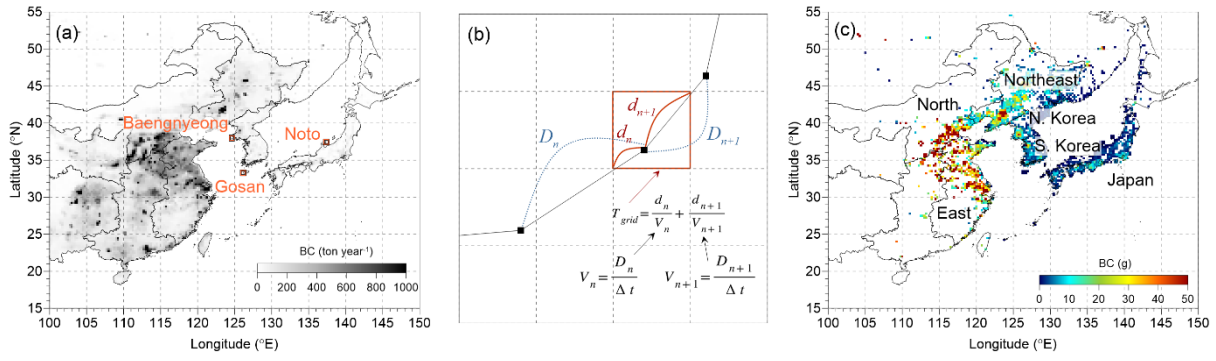

**Figure 1.** (a) The location of three measurement sites (Baengnyeong, Gosan, and Noto) and the black carbon (BC) emission rate (ton year<sup>-1</sup>) over East Asia from the Regional Emission inventory in ASia (REAS) version 2.1 (Kurokawa et al., 2013). (b) Illustration of residence time calculated based on the HYSPLIT backward trajectory that passed over a single grid cell (see details in the manuscript). (c) The location of administrative districts and The spatial distribution of the mean BC mass in the potential emission region, which is the highest BC mass grid of each trajectory. The BC mass was obtained by multiplying (a) the emission rates and (b) the residence time.

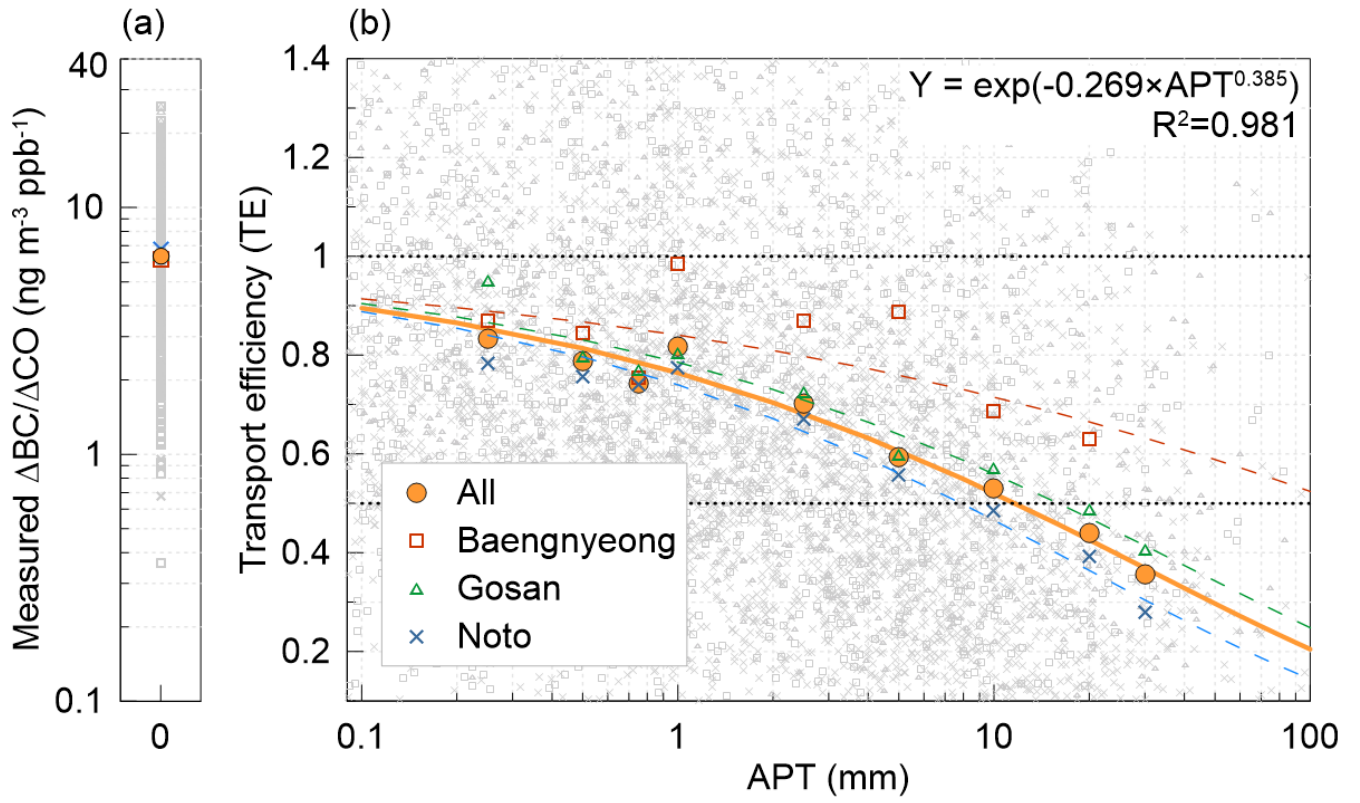

**Figure 2.** Measured  $\Delta BC/\Delta CO$  ratios when accumulated precipitation along trajectory (APT) was zero (left panel) and transport efficiency (TE) variation as a function of APT (right panel) depending on the different sites and overall cases. All data (gray with different symbols) and 9 bins sorted by APT (different colored symbols) are shown. The horizontal dotted lines indicate TE at 0.5 and 1, respectively. The 9 bins consist of 0.01–0.25, 0.25–0.50, 0.50–0.75, 0.75–1.0, 1.0–2.5, 2.5–5.0, 5.0–10, 10–20, and 20–30 mm.

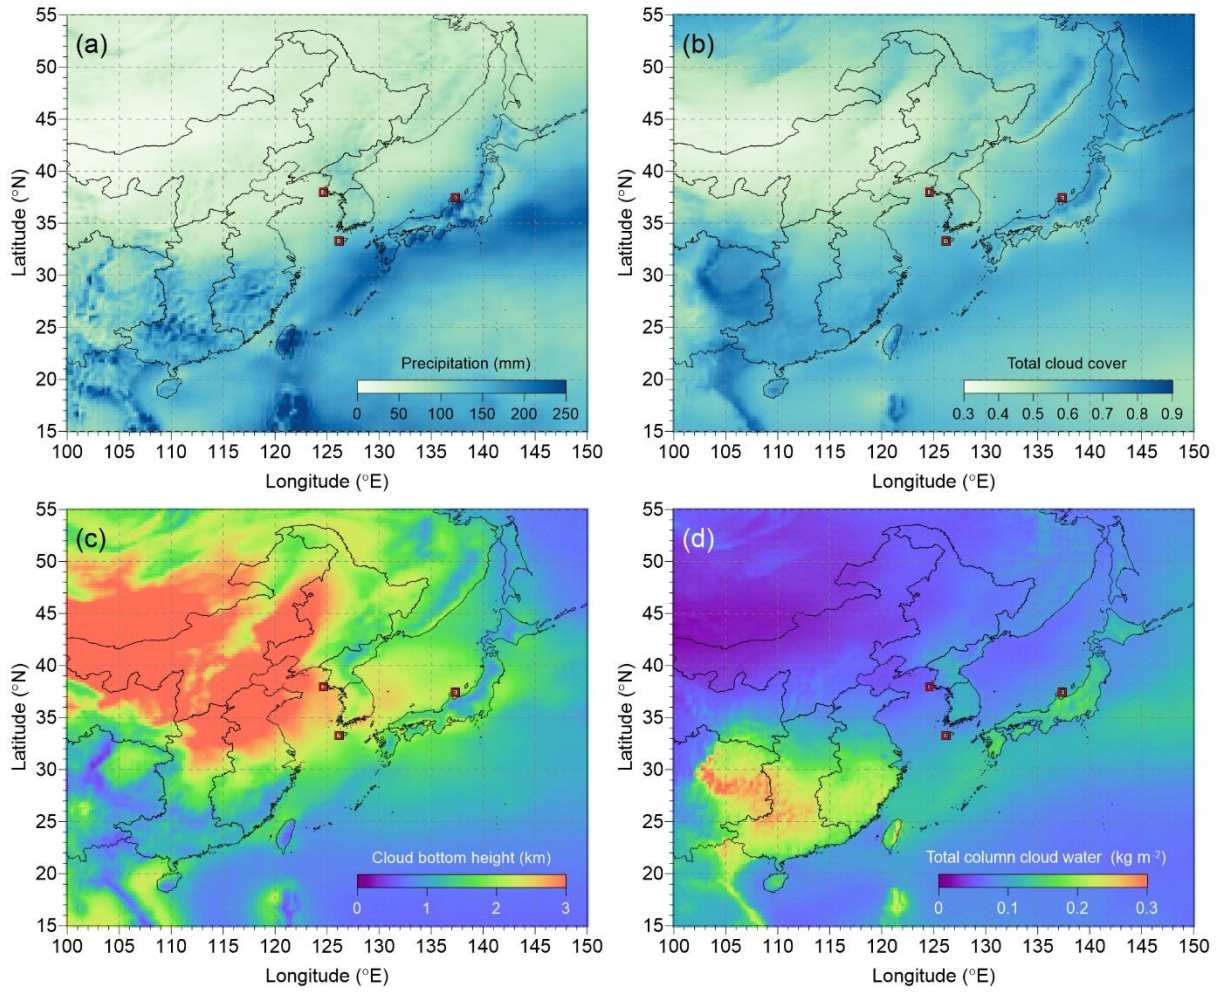

**Figure 3.** Monthly mean meteorological fields over East Asia from 2010 to 2016 derived from the European Centre for Medium-Range Weather Forecasts (ECMWF) ERA5 monthly averaged data at single levels; (a) precipitation (mm), (b) total cloud cover, (c) cloud bottom height (km), and (d) total column cloud total water (ice and liquid).

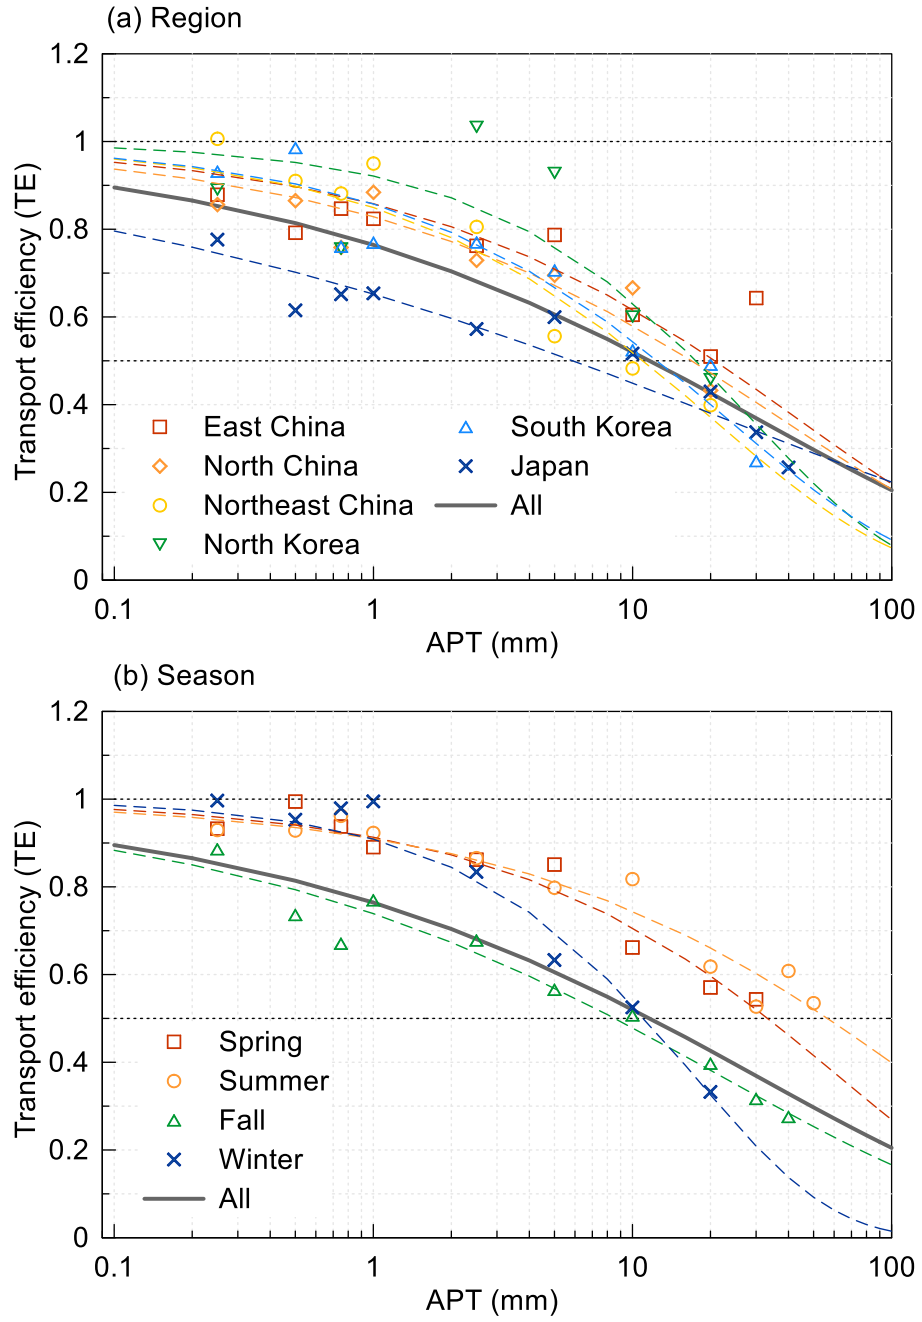

**Figure 4.** Same as Figure 2 except for (a) regional and (b) seasonal variations of TE according to APT. Each colored symbol and dashed line indicate the different regions and seasons and fitting lines according to stretched exponential decay (SED). The thick gray line depicts the overall fitting line. The horizontal dotted lines indicate TE at 0.5 and 1, respectively.

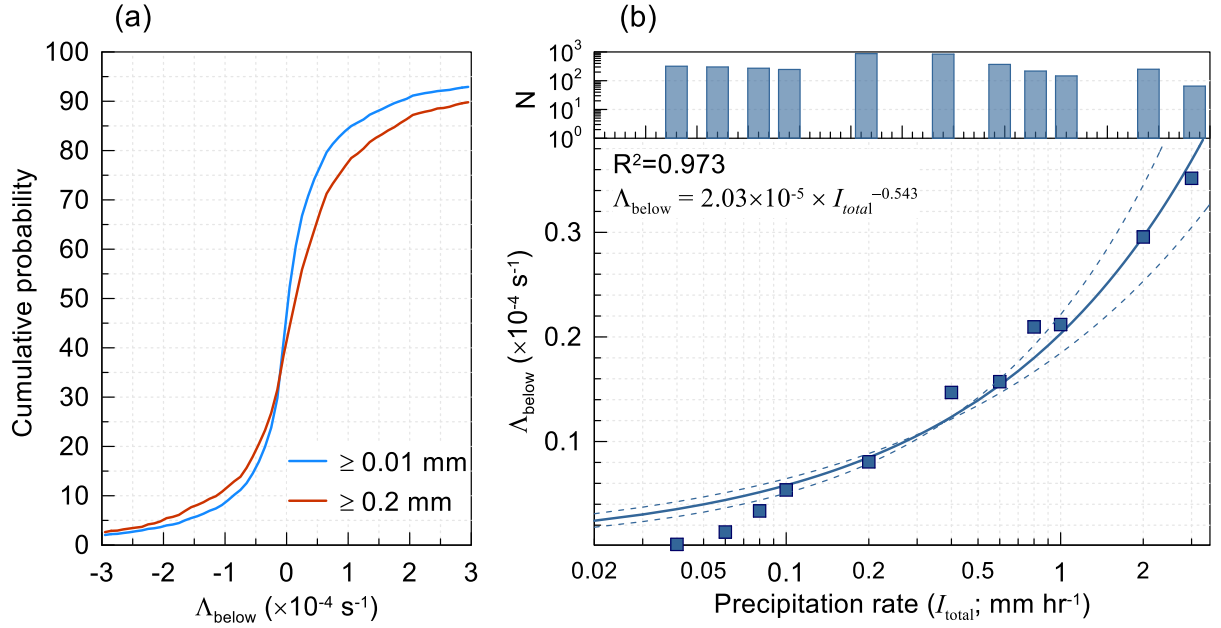

**Figure 5.** (a) Empirical cumulative distribution plot of measured below-cloud scavenging coefficients ( $\Lambda_{\text{below}}$ ;  $\text{s}^{-1}$ ) depending on the precipitation rate ( $\geq 0.01$  and  $\geq 0.2 \text{ mm hr}^{-1}$ ). (b) Median measured  $\Lambda_{\text{below}}$  as a function of the precipitation intensity ( $\text{mm hr}^{-1}$ ) of 11 bins. The dashed line indicates the fit from the equation. The upper panel of (b) shows the number of hourly data points for each bin for  $I_{\text{total}}$ . The 11 bins consist of 0.01–0.04, 0.04–0.06, 0.06–0.08, 0.08–0.1, 0.1–0.2, 0.2–0.4, 0.4–0.6, 0.6–0.8, 0.8–1, 1–2, and 2–3  $\text{mm hr}^{-1}$ .

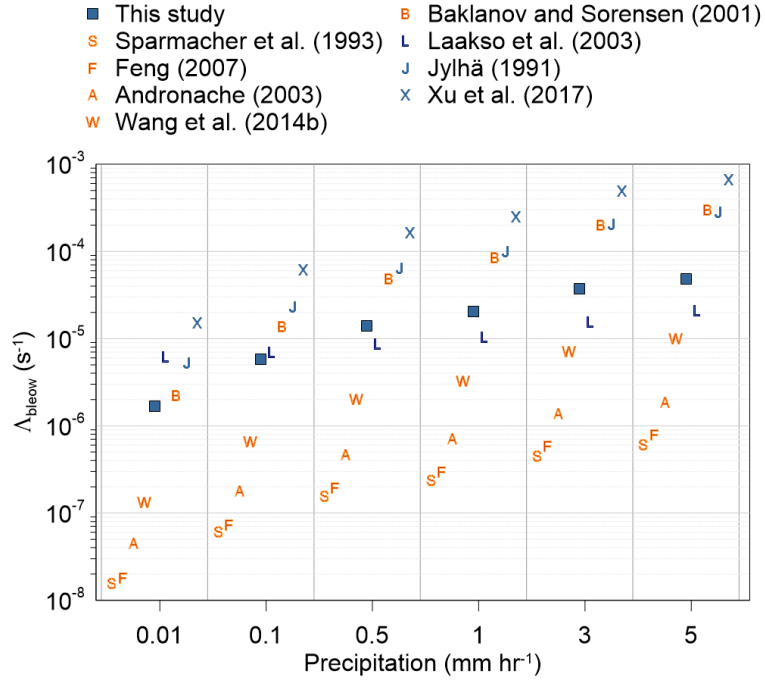

**Figure 6.** Variations in calculated and measured below-cloud scavenging coefficients ( $\Lambda_{\text{below}}$ ; s<sup>-1</sup>) depending on the precipitation intensity (mm hr<sup>-1</sup>). Orange and blue symbols depict the  $\Lambda_{\text{below}}$  equation based on theoretical calculations and observation data, respectively. The diameter of BC was assumed to be approximately 200 nm in the calculation.

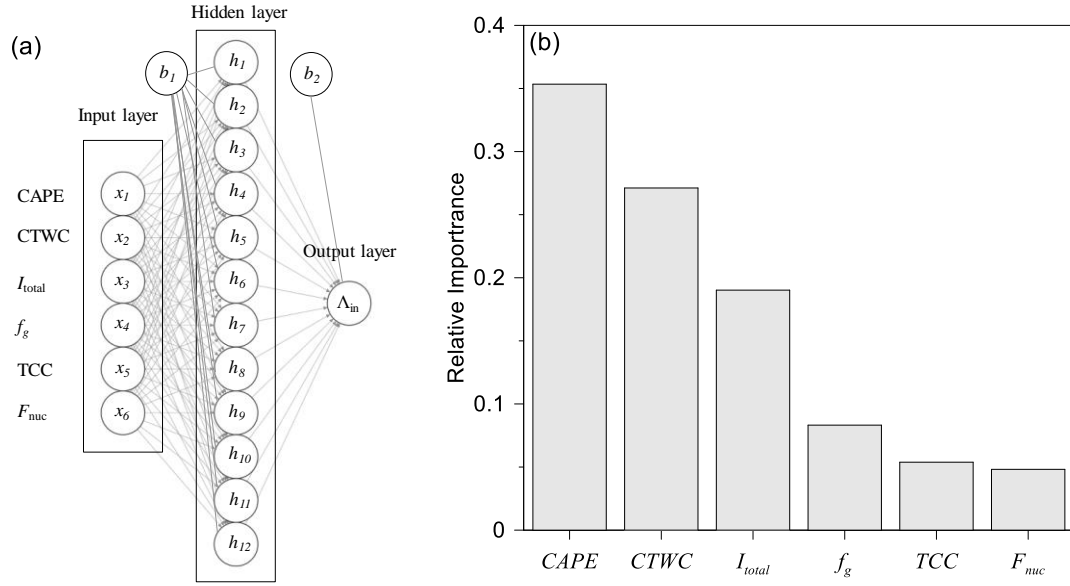

**Figure 7.** (a) Schematic of an artificial neuron network (ANN) model with 12 nodes of a single hidden layer. (b) The relative importance of six input meteorological variables used for calculating in-cloud scavenging coefficients in the FLEXPART model (except for CAPE) using Garson's algorithm implemented in the 'NeuralNetTools' package in R. CAPE, CTWC,  $I_{total}$ ,  $f_g$ , TCC, and  $F_{nuc}$  represent the convective available potential energy, specific cloud total water content, precipitation rate, fraction of a subgrid in a grid cell (see manuscript for details), total cloud cover, and nucleation efficiency, respectively.

**Table 2.** Summary of the relationship between transport efficiency (TE) and accumulated precipitation along trajectory (APT) in Figures 2 and 4.

|             | Fitting parameters <sup>a</sup> |                | R <sup>2</sup> | APT (mm) |        | Number of data points |                                    | Days   |        | Annual<br>Precipitation (mm) |
|-------------|---------------------------------|----------------|----------------|----------|--------|-----------------------|------------------------------------|--------|--------|------------------------------|
|             | A <sub>1</sub>                  | A <sub>2</sub> |                | TE=0.5   | TE=1/e | N <sub>APT=0</sub>    | N <sub>APT&gt;0</sub> <sup>b</sup> | TE=0.5 | TE=1/e |                              |
| All         | 0.269 ± 0.039                   | 0.385 ± 0.035  | 0.981          | 11.7     | 30.2   | 3,565                 | 6,611                              | 2.8    | 7.1    | 1542.3                       |
| Site        |                                 |                |                |          |        |                       |                                    |        |        |                              |
| Baengnyeong | 0.156 ± 0.117                   | 0.350 ± 0.146  | 0.773          | 70.9     | 201.9  | 1,732                 | 1,522                              | 35.5   | 101.2  | 728.3                        |
| Gosan       | 0.235 ± 0.047                   | 0.386 ± 0.047  | 0.964          | 16.4     | 42.3   | 705                   | 1,090                              | 4.9    | 12.5   | 1233.3                       |
| Noto        | 0.306 ± 0.052                   | 0.393 ± 0.036  | 0.985          | 8.0      | 20.3   | 1,128                 | 4,057                              | 1.1    | 2.8    | 2665.3                       |
| Region      |                                 |                |                |          |        |                       |                                    |        |        |                              |
| East        | 0.153 ± 0.099                   | 0.498 ± 0.183  | 0.866          | 20.7     | 43.3   | 439                   | 704                                |        |        |                              |
| North       | 0.188 ± 0.090                   | 0.462 ± 0.175  | 0.897          | 16.9     | 37.3   | 518                   | 495                                |        |        |                              |
| Northeast   | 0.163 ± 0.084                   | 0.603 ± 0.166  | 0.945          | 11.0     | 20.3   | 1,237                 | 2,175                              |        |        |                              |
| N. Korea    | 0.082 ± 0.414                   | 0.745 ± 0.813  | 0.656          | 17.5     | 28.7   | 216                   | 393                                |        |        |                              |
| S. Korea    | 0.154 ± 0.110                   | 0.596 ± 0.188  | 0.922          | 12.5     | 23.2   | 325                   | 680                                |        |        |                              |
| Japan       | 0.428 ± 0.117                   | 0.272 ± 0.089  | 0.925          | 5.9      | 22.6   | 687                   | 1,789                              |        |        |                              |
| Season      |                                 |                |                |          |        |                       |                                    |        |        |                              |
| Spring      | 0.122 ± 0.045                   | 0.506 ± 0.111  | 0.957          | 31.2     | 64.5   | 1,285                 | 1,366                              |        |        |                              |
| Summer      | 0.143 ± 0.107                   | 0.362 ± 0.182  | 0.780          | 77.3     | 212.6  | 497                   | 1,685                              |        |        |                              |
| Fall        | 0.288 ± 0.055                   | 0.397 ± 0.057  | 0.972          | 9.1      | 23.0   | 767                   | 1,606                              |        |        |                              |
| Winter      | 0.070 ± 0.048                   | 0.905 ± 0.192  | 0.964          | 12.5     | 18.7   | 1,016                 | 1,986                              |        |        |                              |

<sup>a</sup>  $TE = \exp(-A_1 \times APT^{A_2})$ <sup>b</sup> The number of satisfactory data points in each bin relative to total  $N_{APT>0} \geq 2\%$



**Table 3.** Summaries of the transport efficiency (TE) and scavenging coefficients for selected (a) below- and (b) in-cloud cases based on ERA5 hourly data of pressure levels from ECMWF.

| Cases                                                                        | Median                | Interquartile range (25 <sup>th</sup> percentile – 75 <sup>th</sup> percentile) |
|------------------------------------------------------------------------------|-----------------------|---------------------------------------------------------------------------------|
| (a) Below cloud ( $N_{case} = 831$ )                                         |                       |                                                                                 |
| TE                                                                           | 0.89                  | [0.61 – 1.27]                                                                   |
| <del>Estimated-Measured</del> $\Lambda_{below}$ ( $s^{-1}$ )                 | $4.01 \times 10^{-6}$ | $[2.70 \times 10^{-6} - 6.33 \times 10^{-6}]$                                   |
| <del>FLEXPART-Calculated</del> $\Lambda_{below}$ ( $s^{-1}$ ) <sup>a</sup>   | $6.63 \times 10^{-6}$ | $[6.38 \times 10^{-6} - 7.08 \times 10^{-6}]$                                   |
| (b) In-cloud ( $N_{case} = 769$ )                                            |                       |                                                                                 |
| TE                                                                           | 0.72                  | [0.43 – 1.06]                                                                   |
| <del>Estimated-Measured</del> $\Lambda_{in}^*$ ( $s^{-1}$ ) <sup>ab</sup>    | $8.06 \times 10^{-5}$ | -                                                                               |
| <del>FLEXPART-Calculated</del> $\Lambda_{in}^*$ ( $s^{-1}$ ) <sup>a, b</sup> | $7.28 \times 10^{-6}$ | -                                                                               |
| <sup>a)</sup> Calculated using FLEXPART scheme                               |                       |                                                                                 |
| <sup>ab)</sup> Overall median value                                          |                       |                                                                                 |

*Supplement of*

**Investigation of the wet removal rate of black carbon in East Asia: validation of a below- and in-cloud wet removal scheme in FLEXPART v10.4**

**Yongjoo Choi et al.**

*Correspondence to:* Yongjoo Choi (choingjoo@jamstec.go.jp)

## **S1 Uncertainty in the transport efficiency (TE) and below- and in-cloud scavenging coefficients**

Our main results, including the TE,  $\Lambda_{\text{below}}$ , and  $\Lambda_{\text{in}}$ , could be influenced by selecting (1) different starting altitudes of the backward trajectories and (2) different altitude criteria for identifying the potential emission region.

First, to investigate the uncertainty caused by different starting altitudes of the backward trajectories, we analyzed the Welch's *t*-test for APT derived from starting altitudes of 500 m and 1000 m. The APT between the two datasets did not show a significant difference (3%) ( $p \geq 0.1$ ). Depending on the site, the TE showed a significant difference ( $p < 0.05$ ) at Gosan only at a relatively small value of  $-4.2\%$ . In the case of regional TE, Northeast China and South Korea were significantly different ( $p < 0.01$ ), with original values up to  $-15\%$ ; however, the corresponding APT for achieving TE=0.5 and TE=1/*e* only decreased by  $-6\%$  and  $-2\%$ , respectively. The regional wet removal efficiency was more apparent, such as more or less APT needed to attain TE=0.5 and TE=1/*e* in low-efficiency regions (East and North China) and high-efficiency regions (South Korea and Japan), respectively. For the high starting altitude, i.e., 1000 m, the air mass had a higher chance of being exposed to in-cloud scavenging resulting in a much lower TE for in-cloud scavenging ( $-3\%$ ). Otherwise, the TE for below-cloud scavenging cases was increased by 7% because of a reduced chance to expose washout effects (Table S1). Because of the variations in the TE for below- and in-cloud scavenging cases, the calculated median  $\Lambda_{\text{below}}$  and  $\Lambda_{\text{in}}$  converged within a similar range as the original results. It should be noted that the median measured  $\Lambda_{\text{below}}$  was slightly higher than the calculated  $\Lambda_{\text{below}}$  according to FLEXPART, which is opposite the original results. The small difference could be ignored when considering the insufficient sample number for below-cloud cases at a starting altitude of 1000 m.

Second, we also checked the difference in wet scavenging efficiency, which can be caused by applying 1.5 km (instead of 2.5 km) as a threshold to determine the potential emission region. The identified six administrative districts for potential emission regions at an altitude of 1.5 km were same as those at an altitude of 2.5 km. The median traveling time from potential source regions to receptor sites was decreased from 38 h to 25 h when precipitation occurred because the individual potential source region was closer to the receptor site because the selection altitude was decreased. However, the difference in traveling time did not significantly influence our final results because the TE for below- and in-cloud cases only decreased by 1% and 6% and the measured  $\Lambda_{\text{below}}$  and  $\Lambda_{\text{in}}$  were consistent with the original results within  $\pm 54\%$  (Table S2). From these results, we confirmed the representativeness of our regional and seasonal wet removal efficiency analysis.

## **S2 Difference in air mass pathways and accumulated precipitation along trajectory (APT) between HYSPLIT and FLEXPART**

We investigated the uncertainty in the air mass pathway and APT between HYSPLIT model using ERA5 and FLEXPART using ERA-Interim during study periods at three sites. It should be noted that the trajectory of FLEXPART was selected as the center of the main grid ( $1^\circ \times 1^\circ$ ) according to the highest residence time in the same time interval and then compared with HYSPLIT results by calculating the distance between two hourly endpoints. Thus, differences of less than  $\sim 100$  km can be regarded as a good agreement when considering the grid resolution of FLEXPART. The difference in distance increased as the traveling time was increased. However, the median traveling time of air masses, including APT=0 case, was 31 h, which showed a difference in distance of  $\sim 100$  km. When the traveling time was expanded up to the 75%ile of the traveling time (50 h), the difference in distance was close to  $\sim 200$  km. Although the difference in distance at 72 h traveling time was high, 72 h traveling time cases was so rare that we could neglect the impacts on our results. In total, the median difference in distance was  $\sim 47$  km, suggesting good agreement between the two datasets. In addition, the difference in accumulated backward-trajectory endpoints

was much smaller because random errors in the single calculations can be diminished by increasing the number of calculations (Gebhart et al., 2005; Jeong et al., 2017).

Figure S2 presents the cumulative probability of APT from HYSPLIT and FLEXPART. Although the air mass pathway showed insignificant differences between the two models, the median APT of FLEXPART (1.2 mm) was two times higher than that of HYSPLIT (0.63 mm), indicating a higher bias of the FLEXPART APT. This result can be caused by the difference in meteorological input data and the treatment of precipitation fields, homogeneous precipitation in a single grid cell ( $0.25^{\circ} \times 0.25^{\circ}$ ) in HYSPLIT and disaggregated precipitation induced by interpolating in time and space in FLEXPART (Hittmeir et al., 2018). The higher bias in the FLEXPART APT contributed to increasing the magnitude of the underestimation of FLEXPART TE when assuming the same APT from HYSPLIT model, indicating an insignificant impact on the results.

Gebhart, K.A., Schichtel, B.A., Barna, M.G.: Directional biases in back trajectories caused by model and input data. *J. Air Waste Manag.* 55, 1649-1662, 2005.

Jeong, U., Kim, J., Lee, H., Lee, Y.G.: Assessing the effect of long-range pollutant transportation on air quality in Seoul using the conditional potential source contribution function method. *Atmos. Environ.*, 150, 33-44, 2017.

Hittmeir, S., Philipp, A., and Seibert, P.: A conservative reconstruction scheme for the interpolation of extensive quantities in the Lagrangian particle dispersion model FLEXPART. *Geosci. Model Dev.*, 11, 2503-2523, <https://doi.org/10.5194/gmd-11-2503-2018>, 2018.

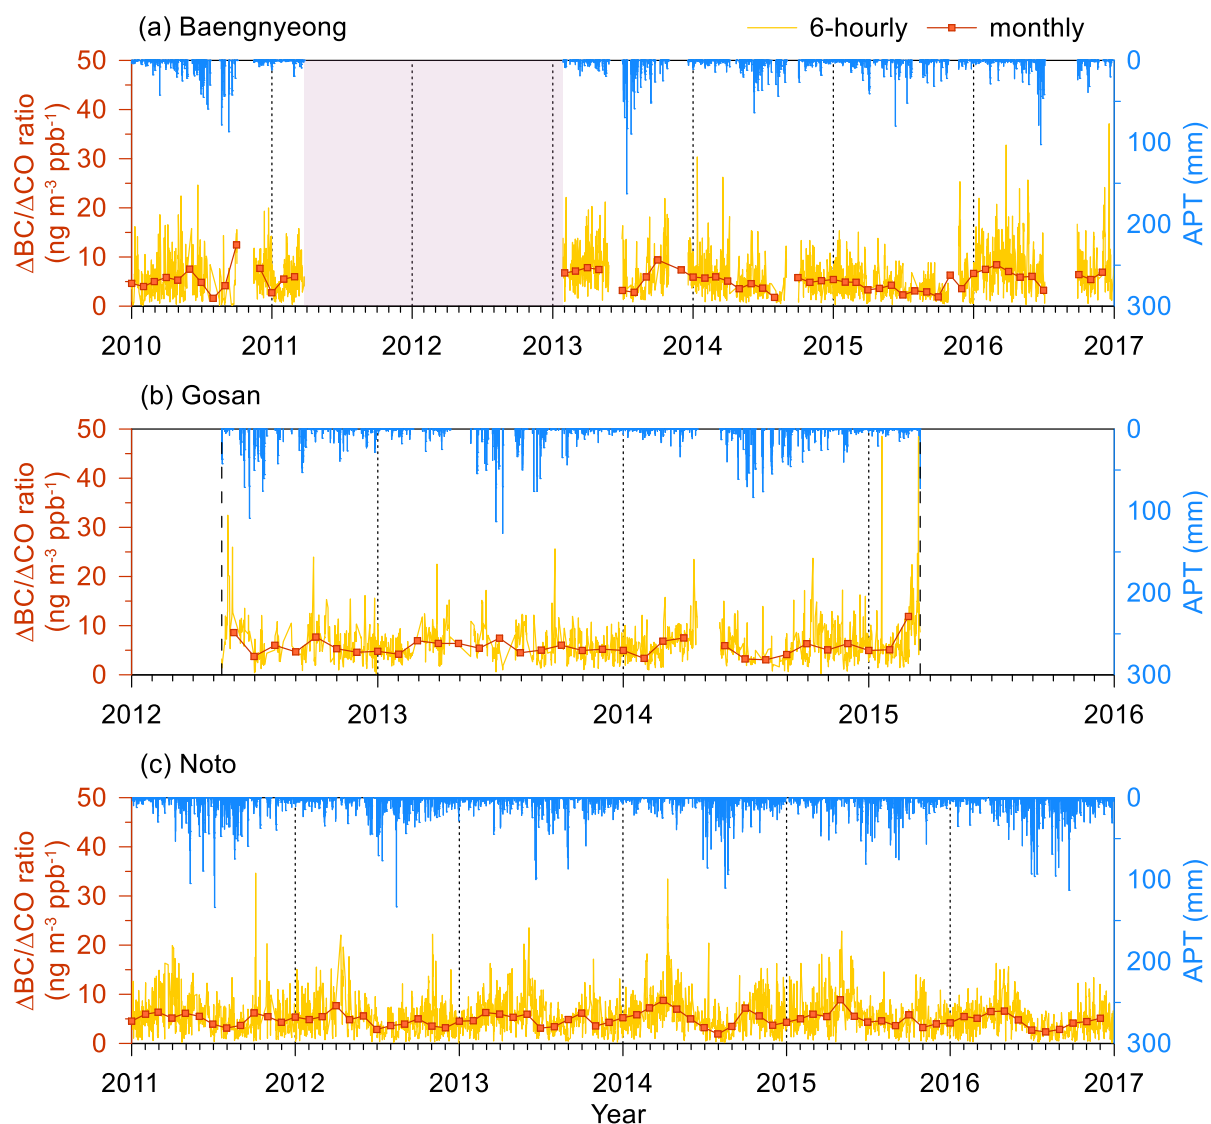

**Figure S1.** Time series of the  $\Delta BC/\Delta CO$  ratio and accumulated precipitation along trajectory (APT) during the measurement periods in (a) Baengnyeong (1 Jan 2010–31 Dec 2016), (b) Gosan (1 May 2012–30 Apr 2015), and (c) Noto (1 Jan 2011–31 Dec 2016). The square symbols with solid lines indicate monthly concentrations. The red shaded region in the Baengnyeong figure indicates periods of data missing from 2011 to 2012 due to the absence of CO data.

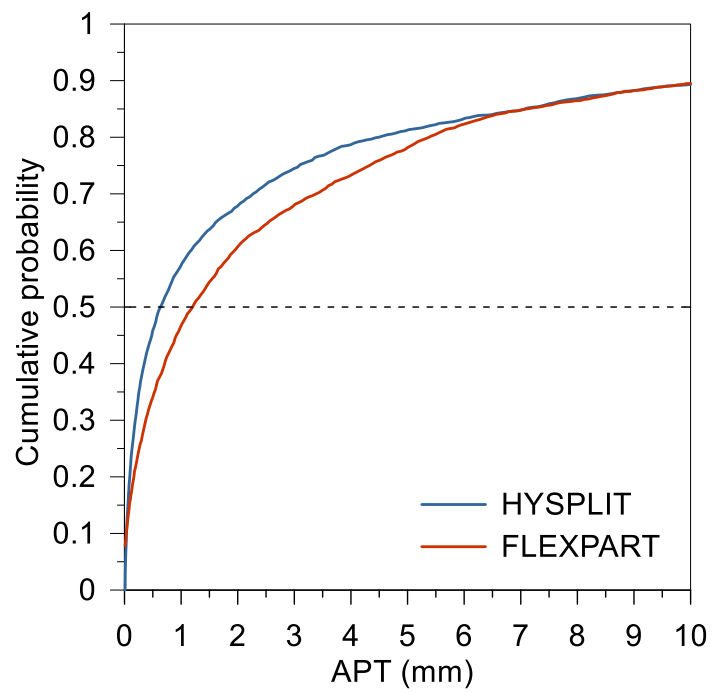

**Figure S2.** Cumulative probability plot of the APT from HYSPLIT (blue) and FLEXPART (red) during the study periods at the three sites. The dashed black line indicated a cumulative probability at 0.5 (median).



**Table S1.** Same as Table 2 except for the different backward trajectory starting altitudes (1000 m)

| Cases                                                   | Median                | Interquartile range (25 <sup>th</sup> percentile – 75 <sup>th</sup> percentile) |
|---------------------------------------------------------|-----------------------|---------------------------------------------------------------------------------|
| (a) Below cloud ( $N_{case} = 262$ )                    |                       |                                                                                 |
| TE                                                      | 0.95                  | [0.65 – 1.28]                                                                   |
| Measured $\Lambda_{below}$ ( $s^{-1}$ )                 | $8.85 \times 10^{-6}$ | $[6.57 \times 10^{-6} - 1.46 \times 10^{-5}]$                                   |
| Calculated $\Lambda_{below}$ ( $s^{-1}$ ) <sup>a</sup>  | $7.49 \times 10^{-6}$ | $[6.83 \times 10^{-6} - 8.42 \times 10^{-6}]$                                   |
| (b) In-cloud ( $N_{case} = 953$ )                       |                       |                                                                                 |
| TE                                                      | 0.70                  | [0.46 – 1.02]                                                                   |
| Measured $\Lambda_{in}^*$ ( $s^{-1}$ ) <sup>b</sup>     | $7.67 \times 10^{-5}$ | -                                                                               |
| Calculated $\Lambda_{in}^*$ ( $s^{-1}$ ) <sup>a,b</sup> | $8.01 \times 10^{-6}$ | -                                                                               |
| <sup>a</sup> ) Calculated using FLEXPART scheme         |                       |                                                                                 |
| <sup>b</sup> ) Overall median value                     |                       |                                                                                 |

**Table S2.** Same as Table 2 except for the different altitude criteria (1.5 km) for identifying potential emission source regions.

| Cases                                                   | Median                | Interquartile range (25 <sup>th</sup> percentile – 75 <sup>th</sup> percentile) |
|---------------------------------------------------------|-----------------------|---------------------------------------------------------------------------------|
| (a) Below cloud ( $N_{case} = 436$ )                    |                       |                                                                                 |
| TE                                                      | 0.88                  | [0.60 – 1.24]                                                                   |
| Measured $\Lambda_{below}$ ( $s^{-1}$ )                 | $6.17 \times 10^{-6}$ | $[2.55 \times 10^{-6} - 1.39 \times 10^{-5}]$                                   |
| Calculated $\Lambda_{below}$ ( $s^{-1}$ ) <sup>a</sup>  | $7.52 \times 10^{-6}$ | $[6.88 \times 10^{-6} - 8.50 \times 10^{-6}]$                                   |
| (b) In-cloud ( $N_{case} = 282$ )                       |                       |                                                                                 |
| TE                                                      | 0.68                  | [0.44 – 1.03]                                                                   |
| Measured $\Lambda_{in}^*$ ( $s^{-1}$ ) <sup>b</sup>     | $9.39 \times 10^{-5}$ | -                                                                               |
| Calculated $\Lambda_{in}^*$ ( $s^{-1}$ ) <sup>a,b</sup> | $8.15 \times 10^{-6}$ | -                                                                               |
| <sup>a</sup> ) Calculated using FLEXPART scheme         |                       |                                                                                 |
| <sup>b</sup> ) Overall median value                     |                       |                                                                                 |
